# Supplementary material for: Analyses of 32 Loci Clarify Phylogenetic Relationships among Trypanosoma cruzi Lineages and Support a Single Hybridization prior to Human Contact
Source: PubMed Central journal article supplement (PMC3149036; doi:10.1371/journal.pntd.0001272), 2011-08-02
Supplement: pntd.0001272.s001.pdf [file pntd.0001272.s001.pdf]

**Tc00.1047053510889.310**

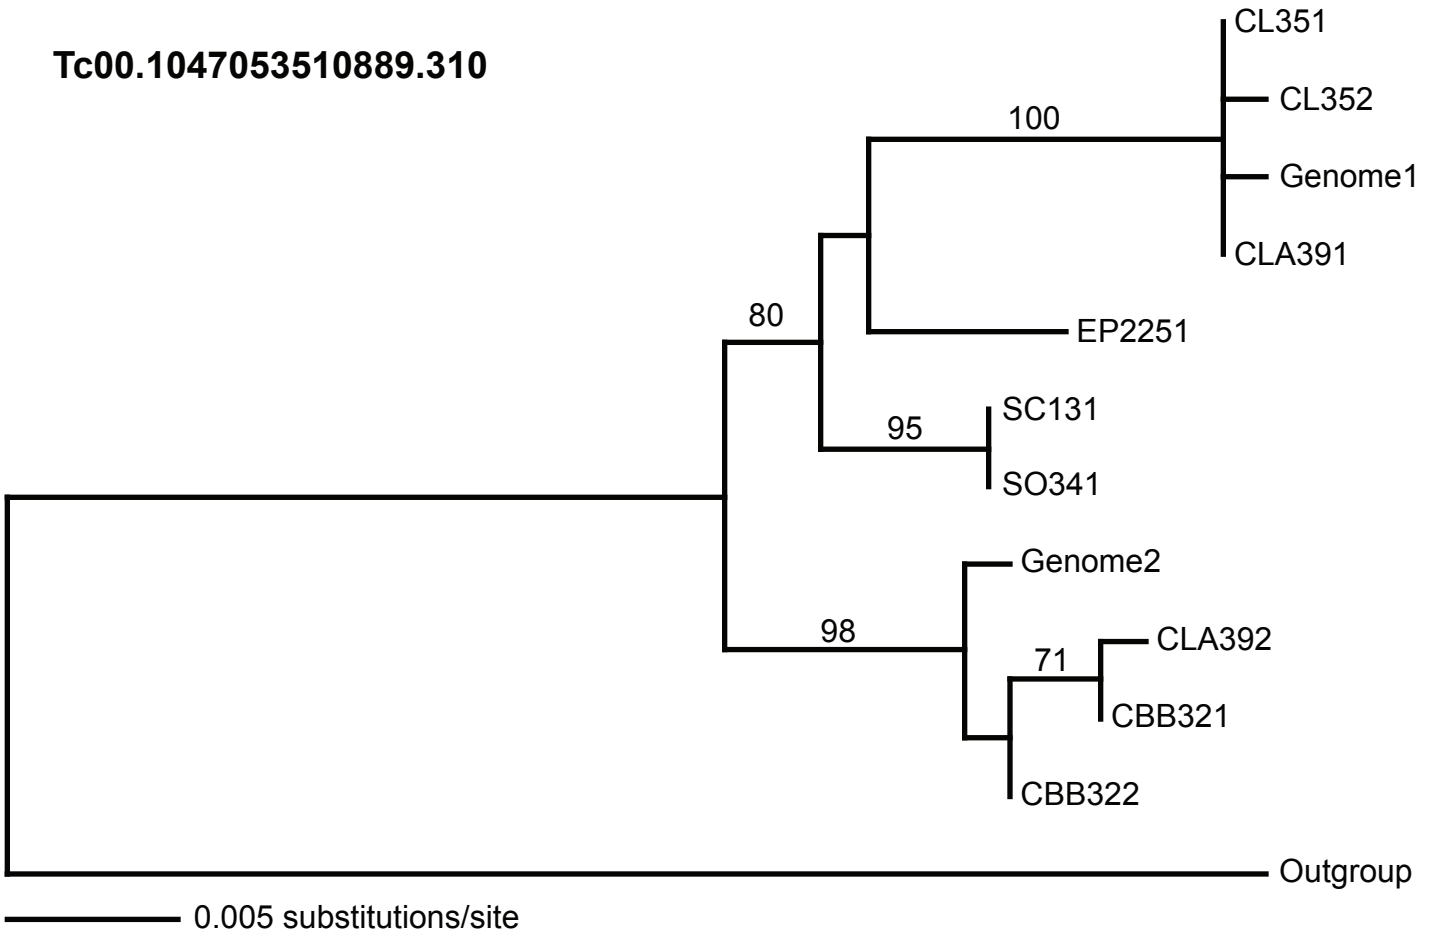

**Tc00.1047053509561.20**

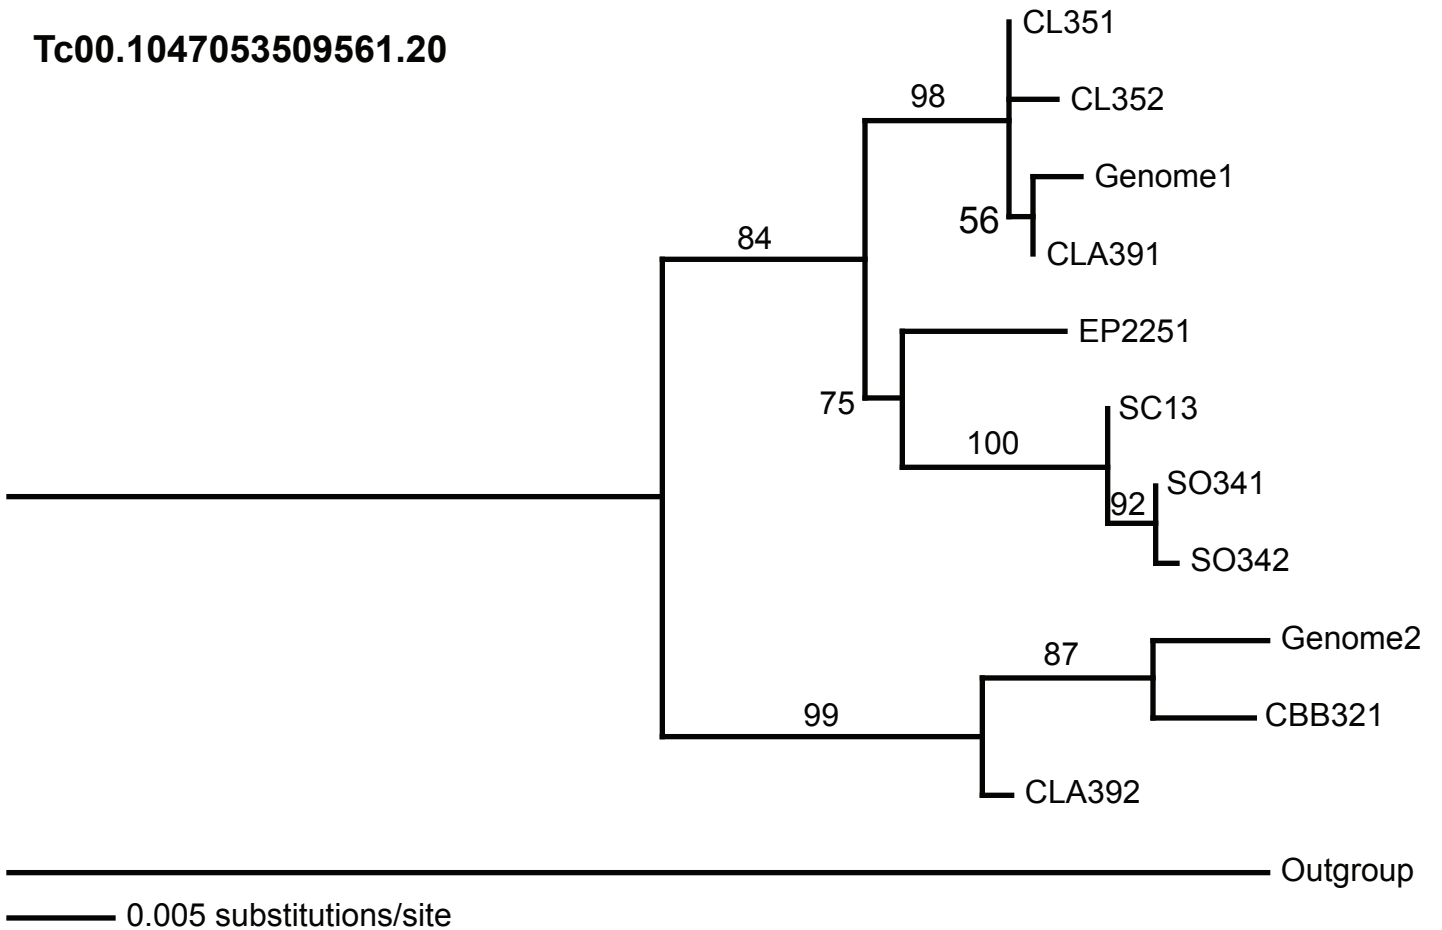

**Tc00.1047053508719.70**

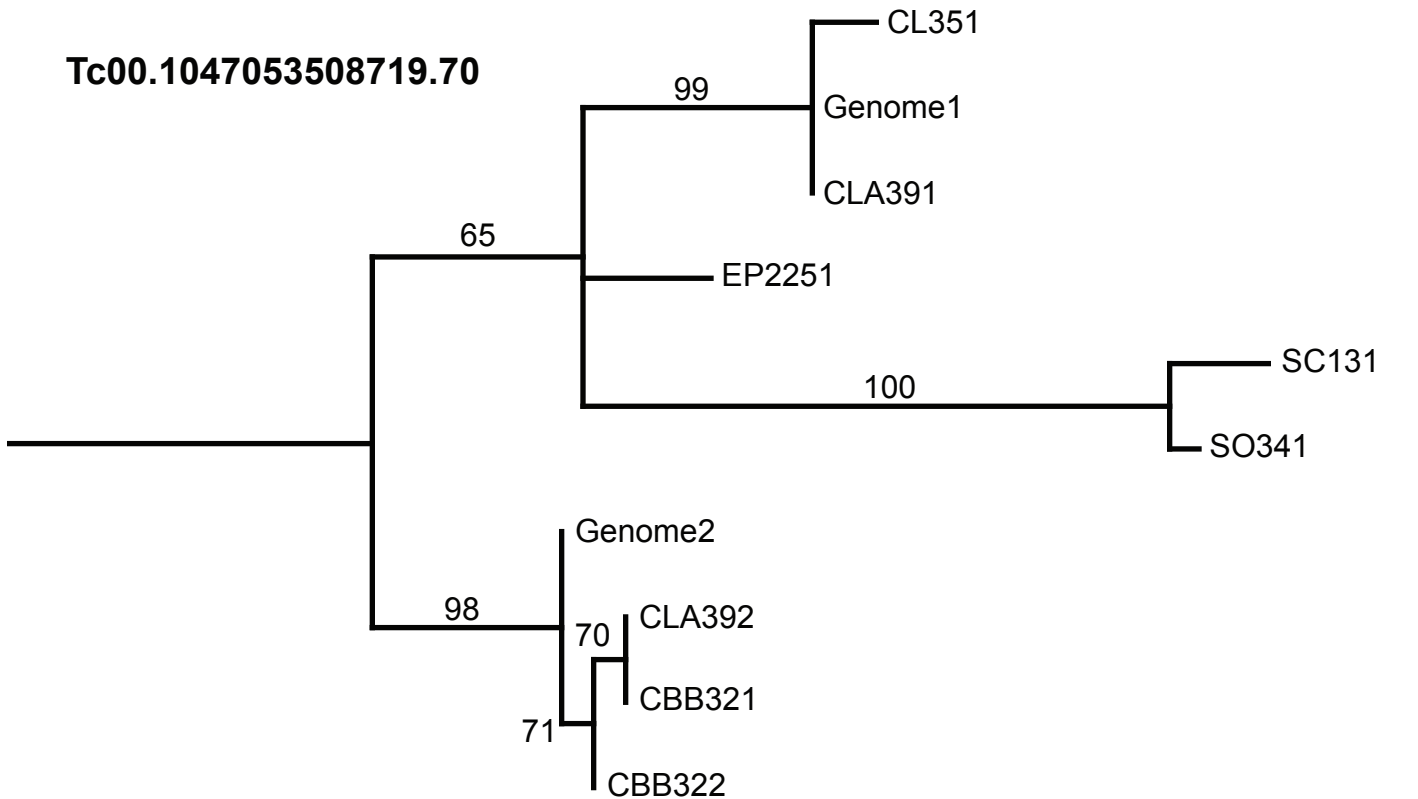

Outgroup

0.005 substitutions/site

**Tc00.1047053508461.80**

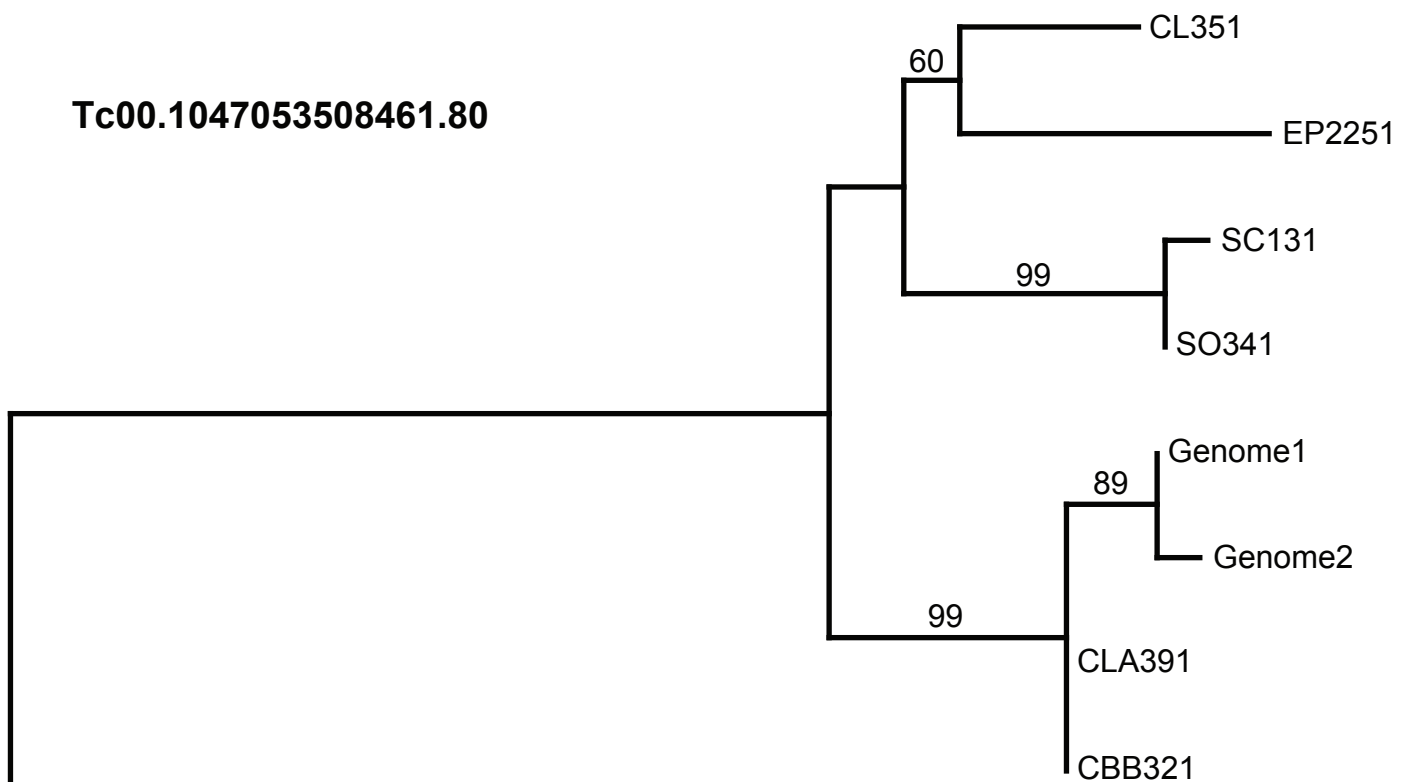

Outgroup

0.005 substitutions/site

**Tc00.1047053506529.310**

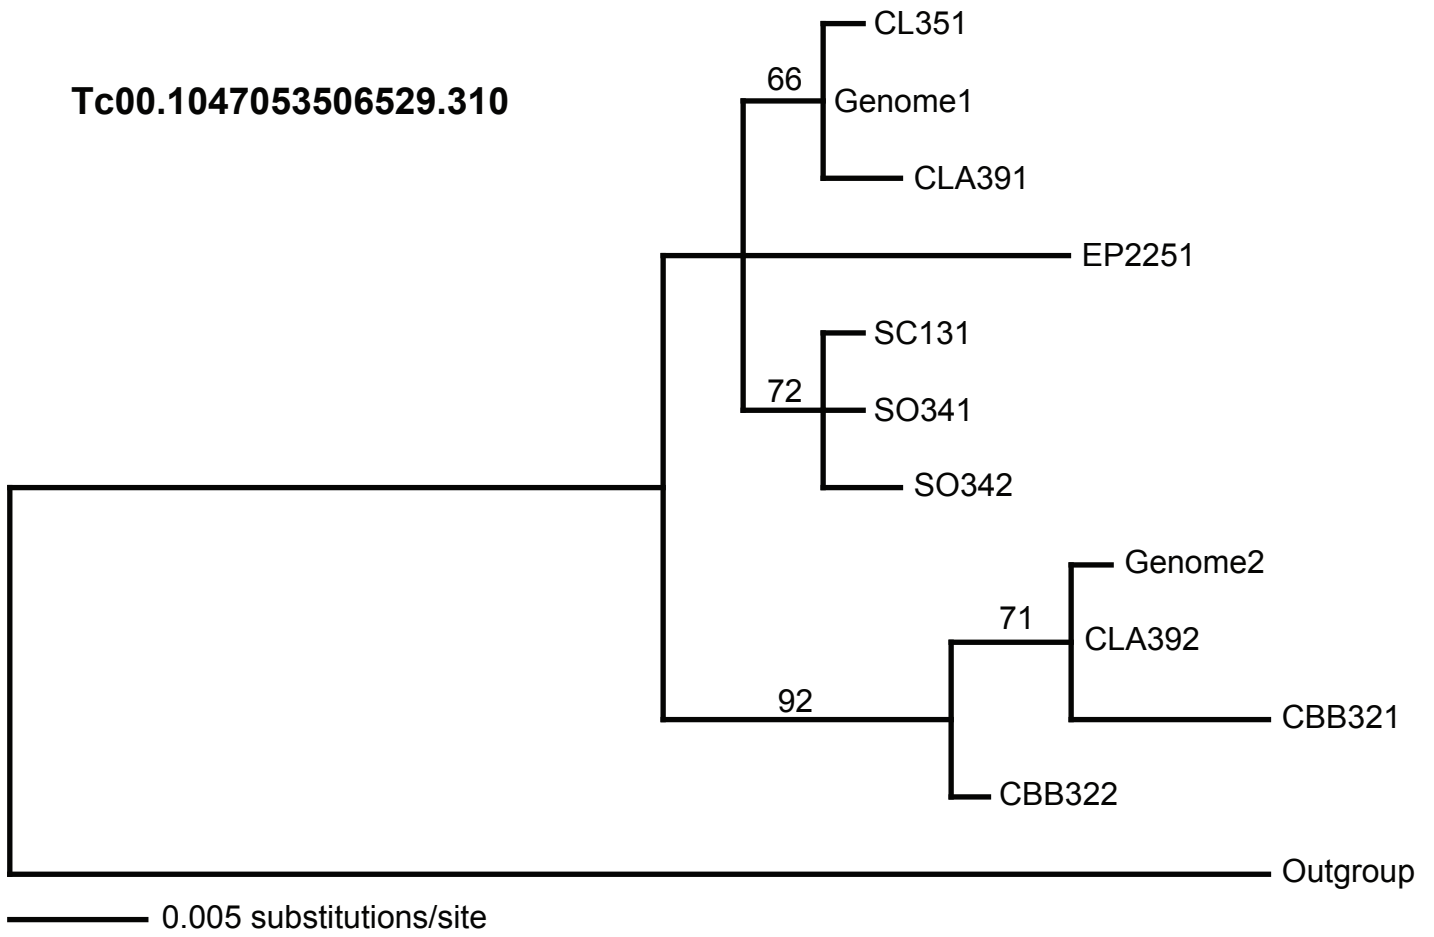

**Tc00.1047053504059.20**

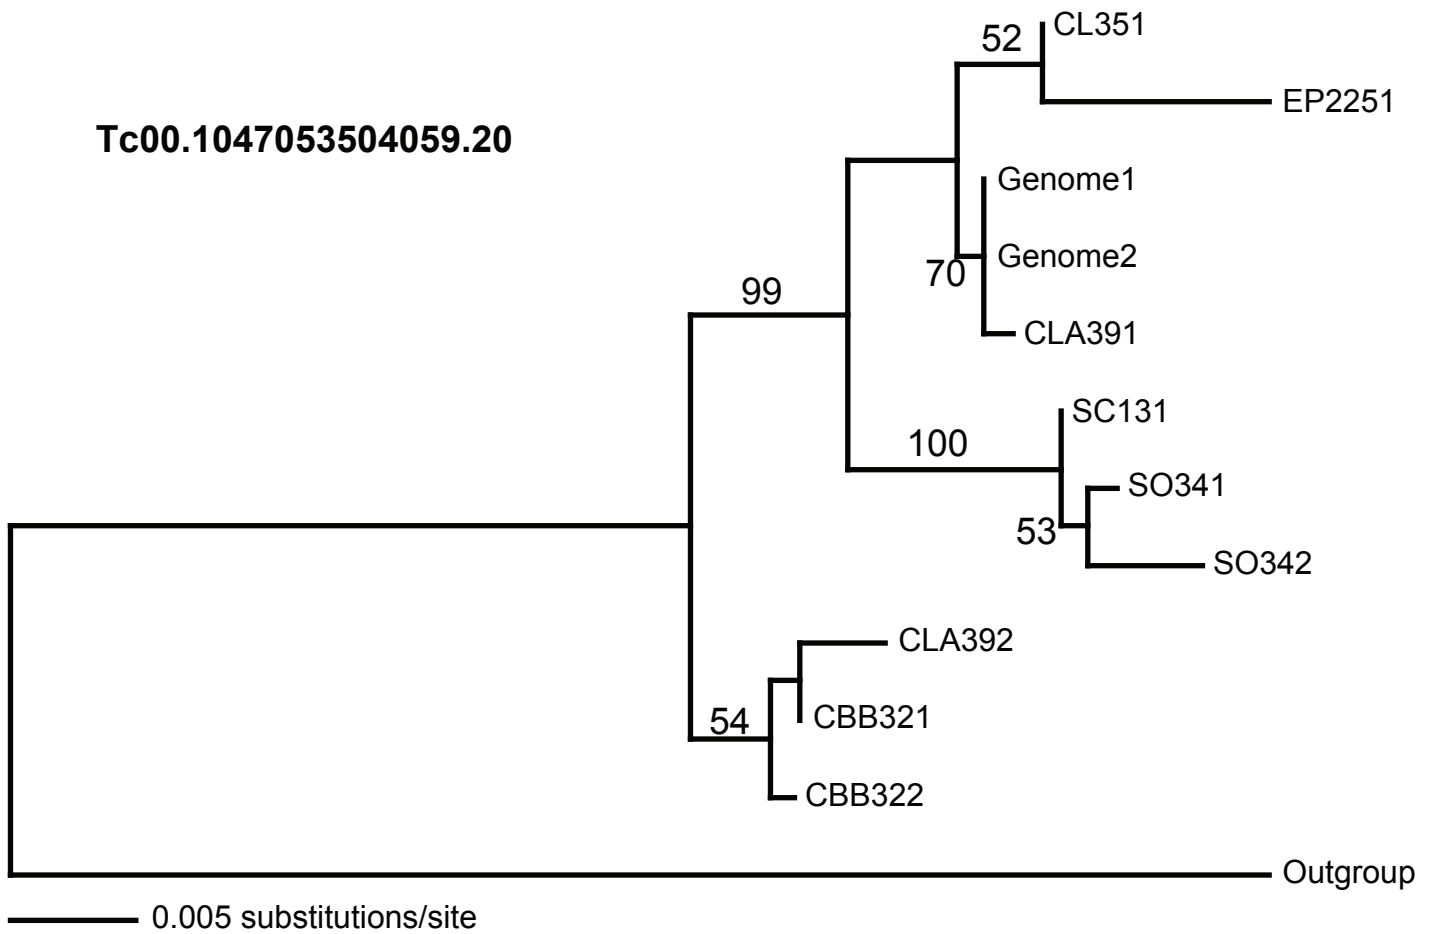

**Tc00.1047053504013.40**

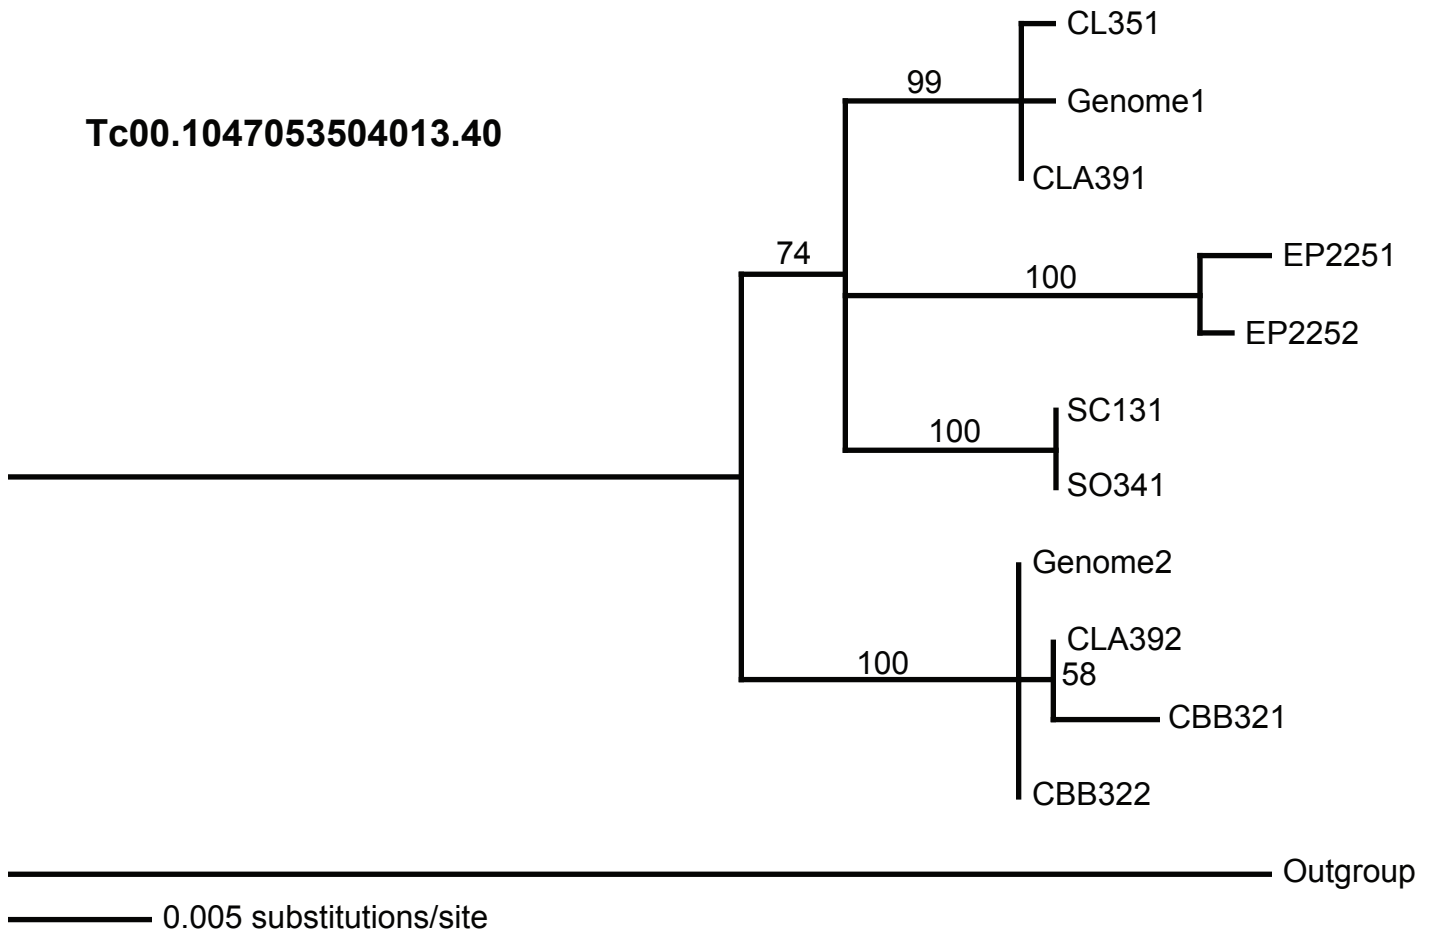

**Tc00.1047053503909.76**

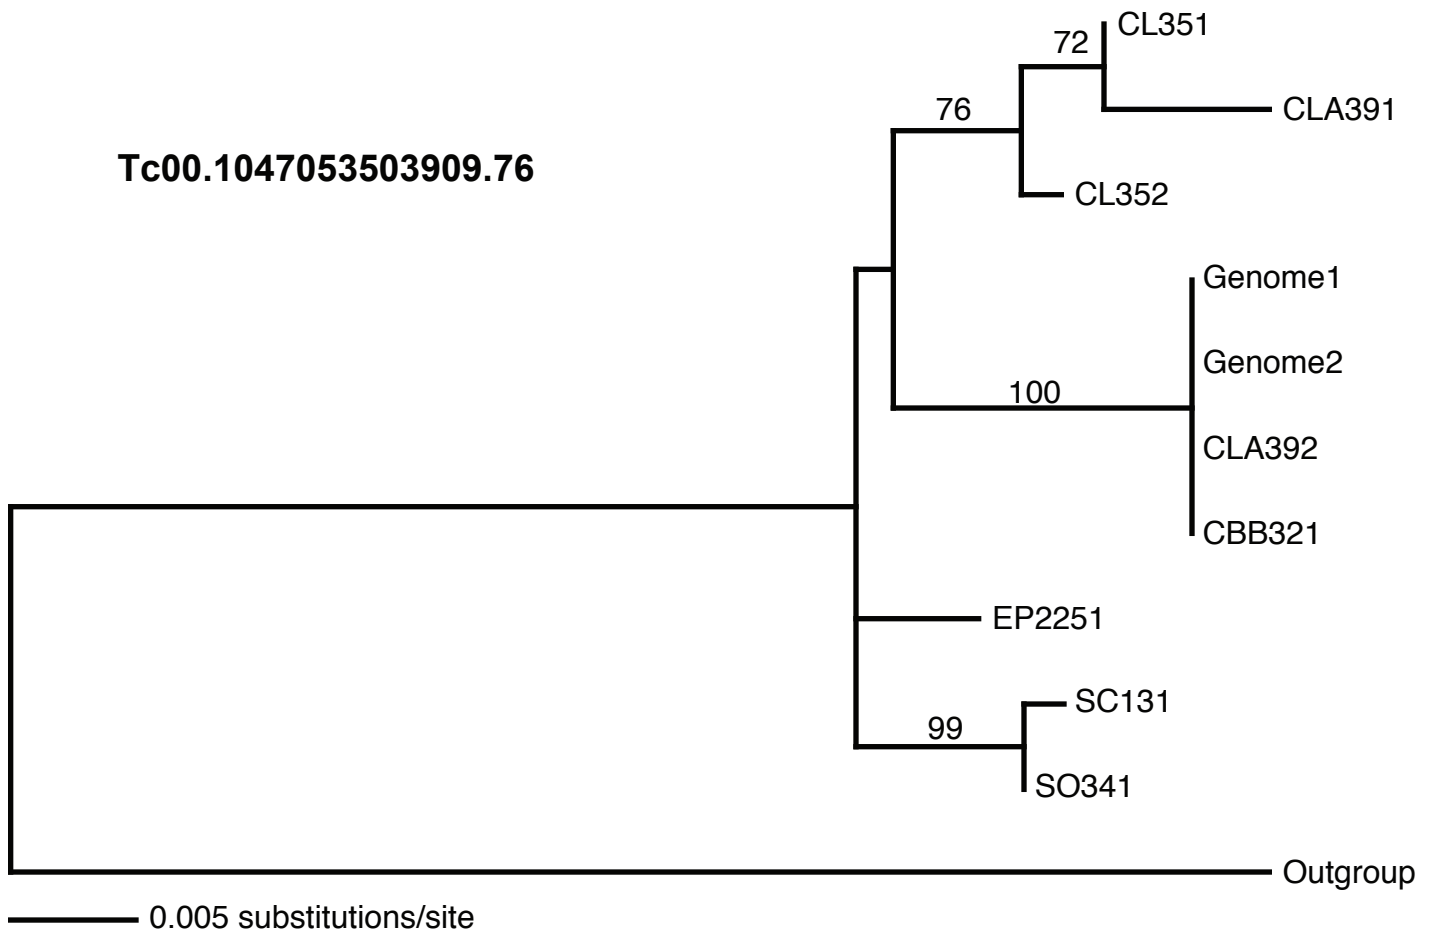

**Tc00.1047053510889.210**

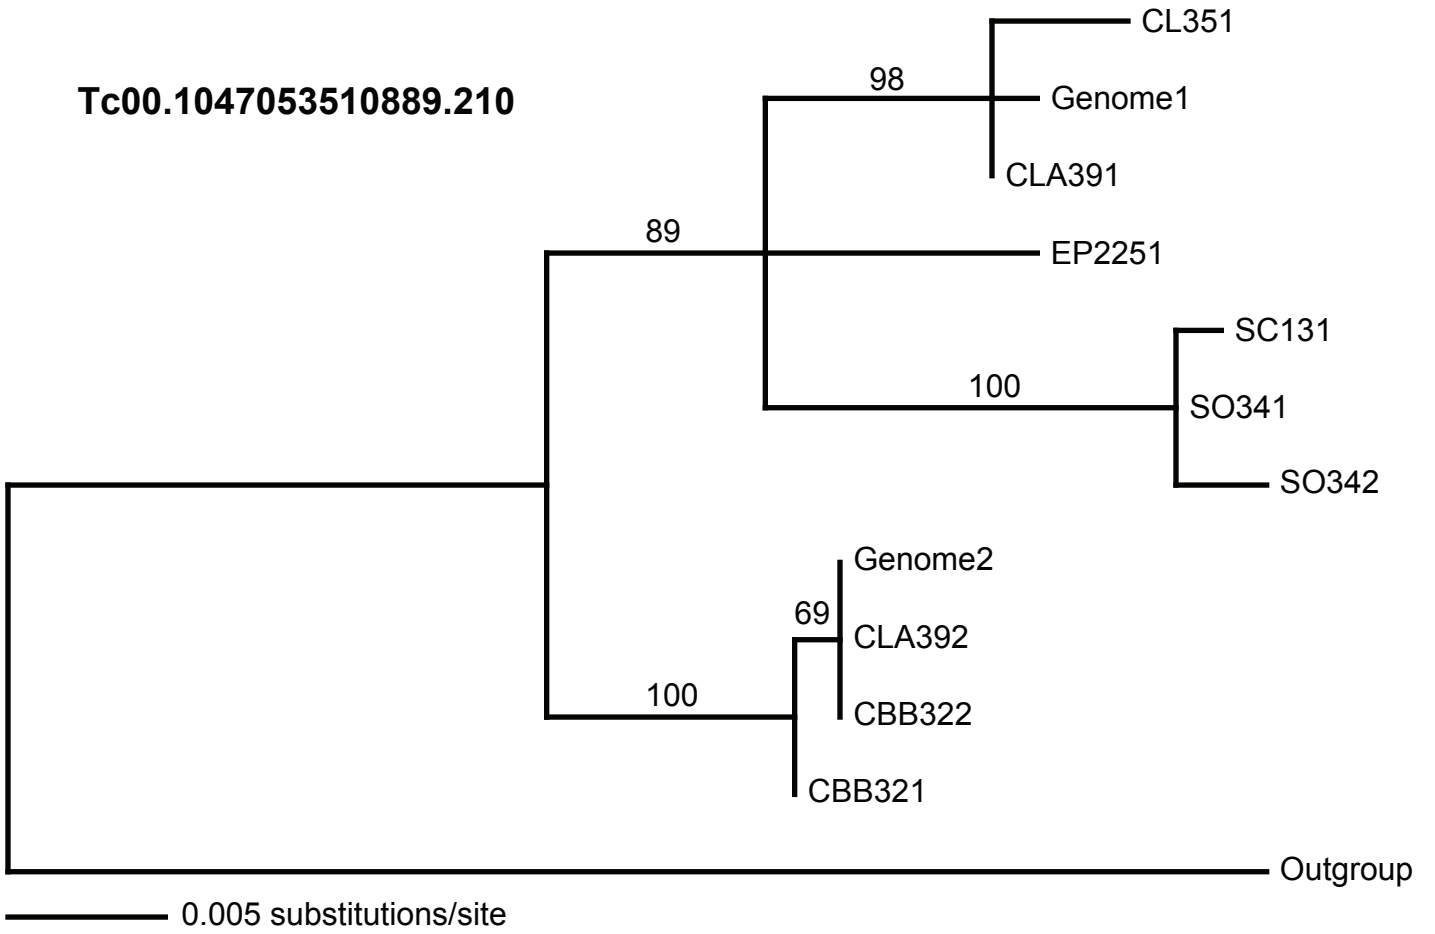

**Tc00.1047053507801.70**

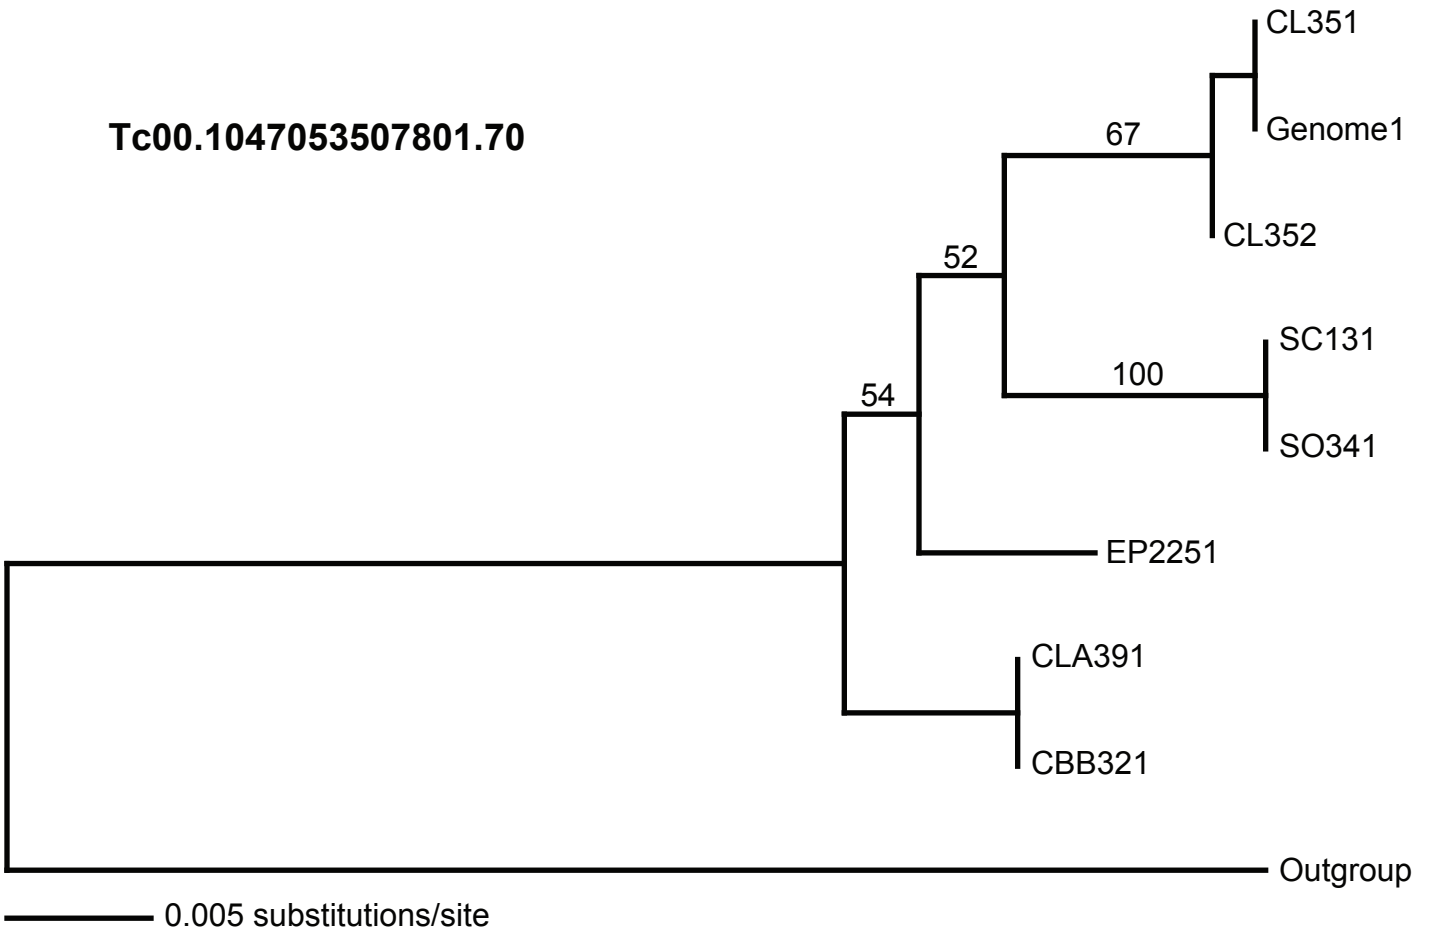

**Tc00.1047053510123.24**

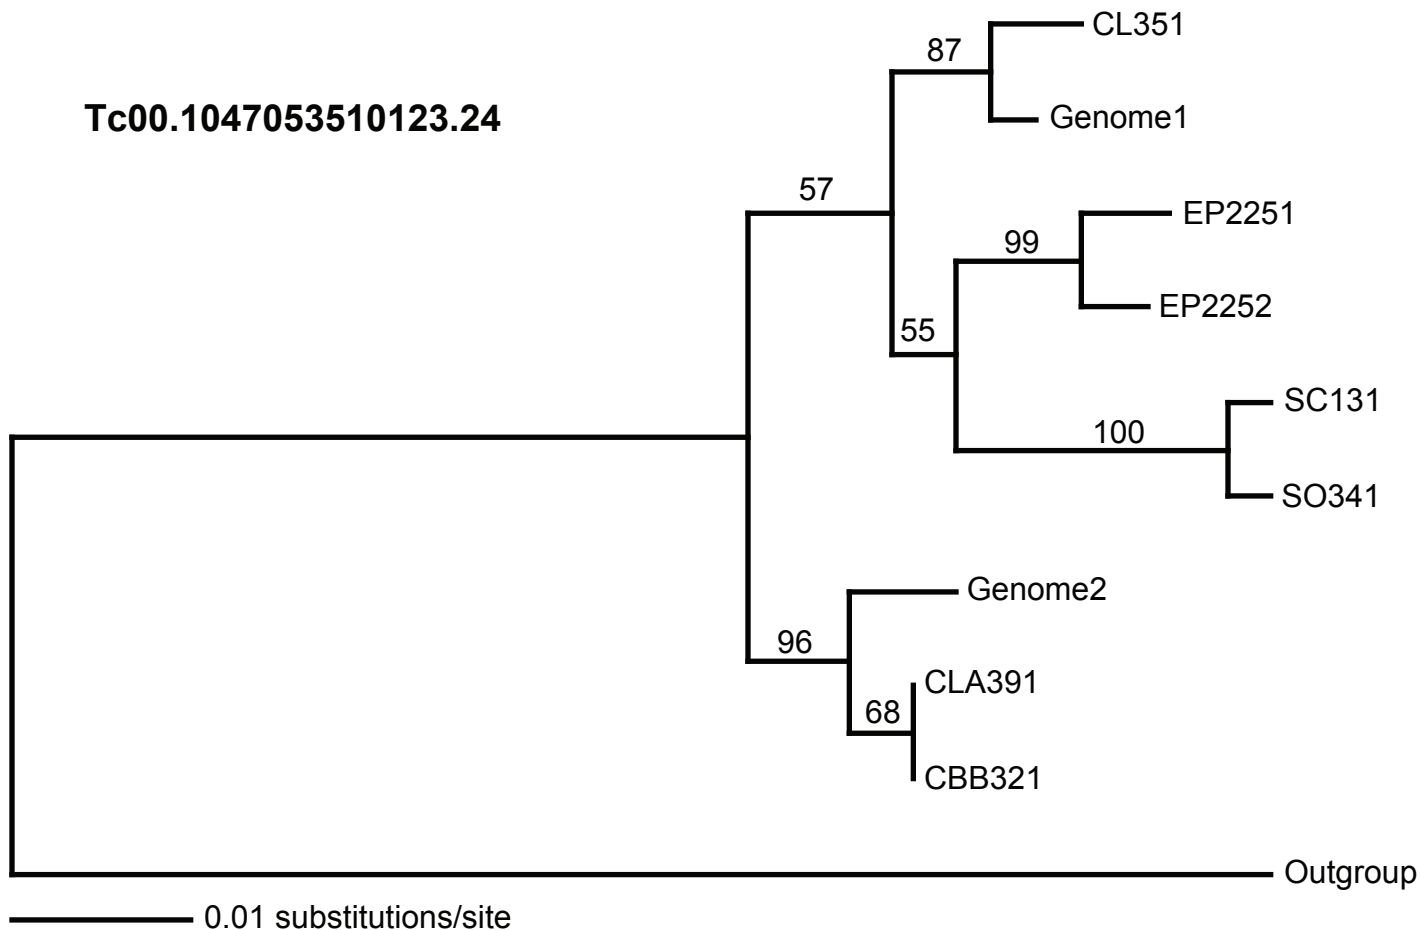

**Tc00.1047053511529.200**

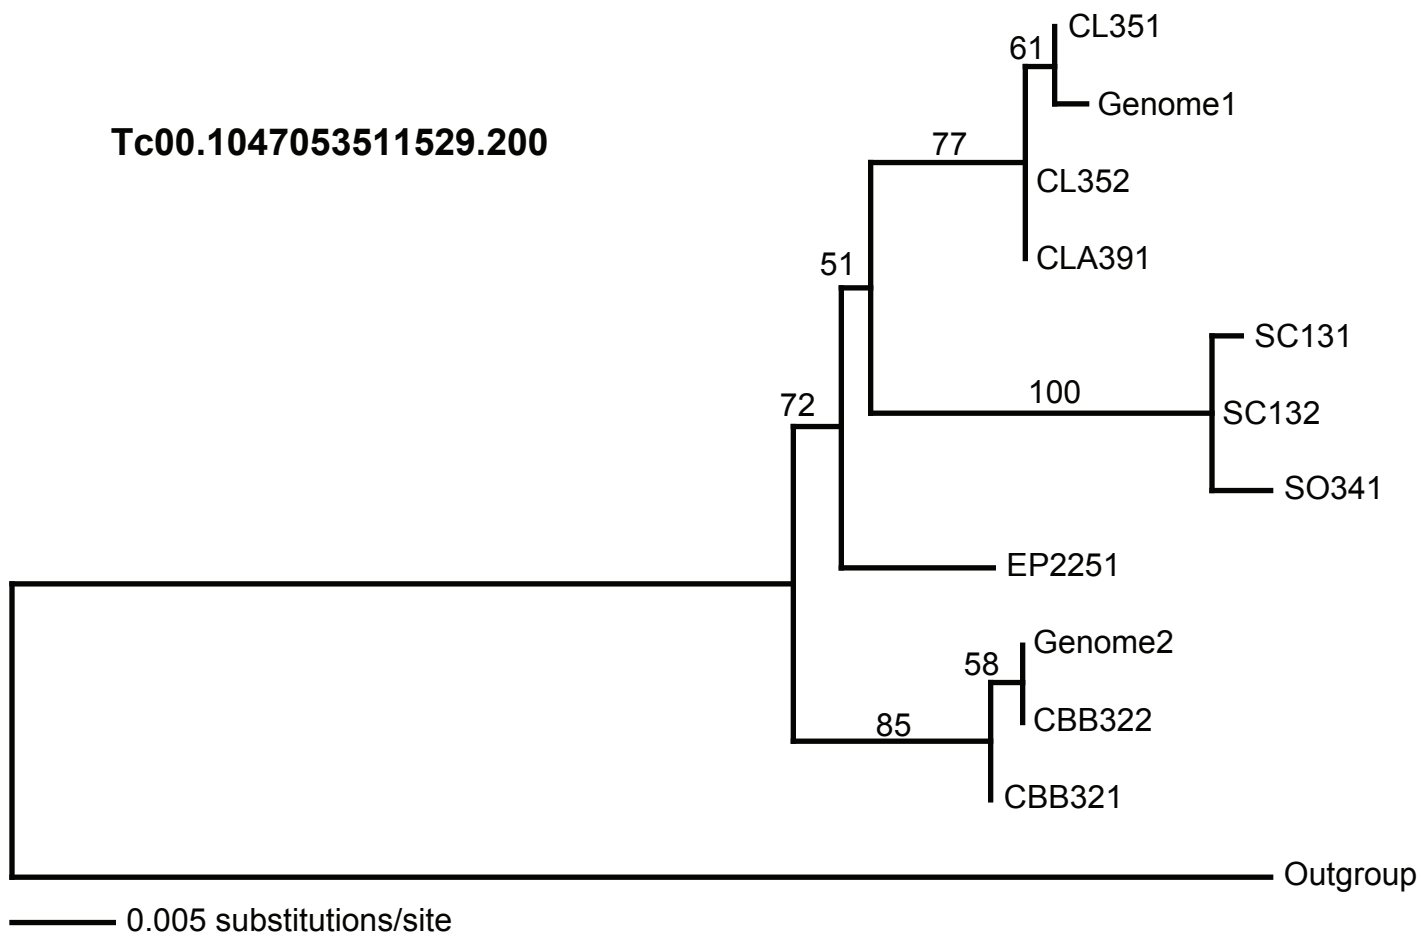

**Tc00.1047053511153.124**

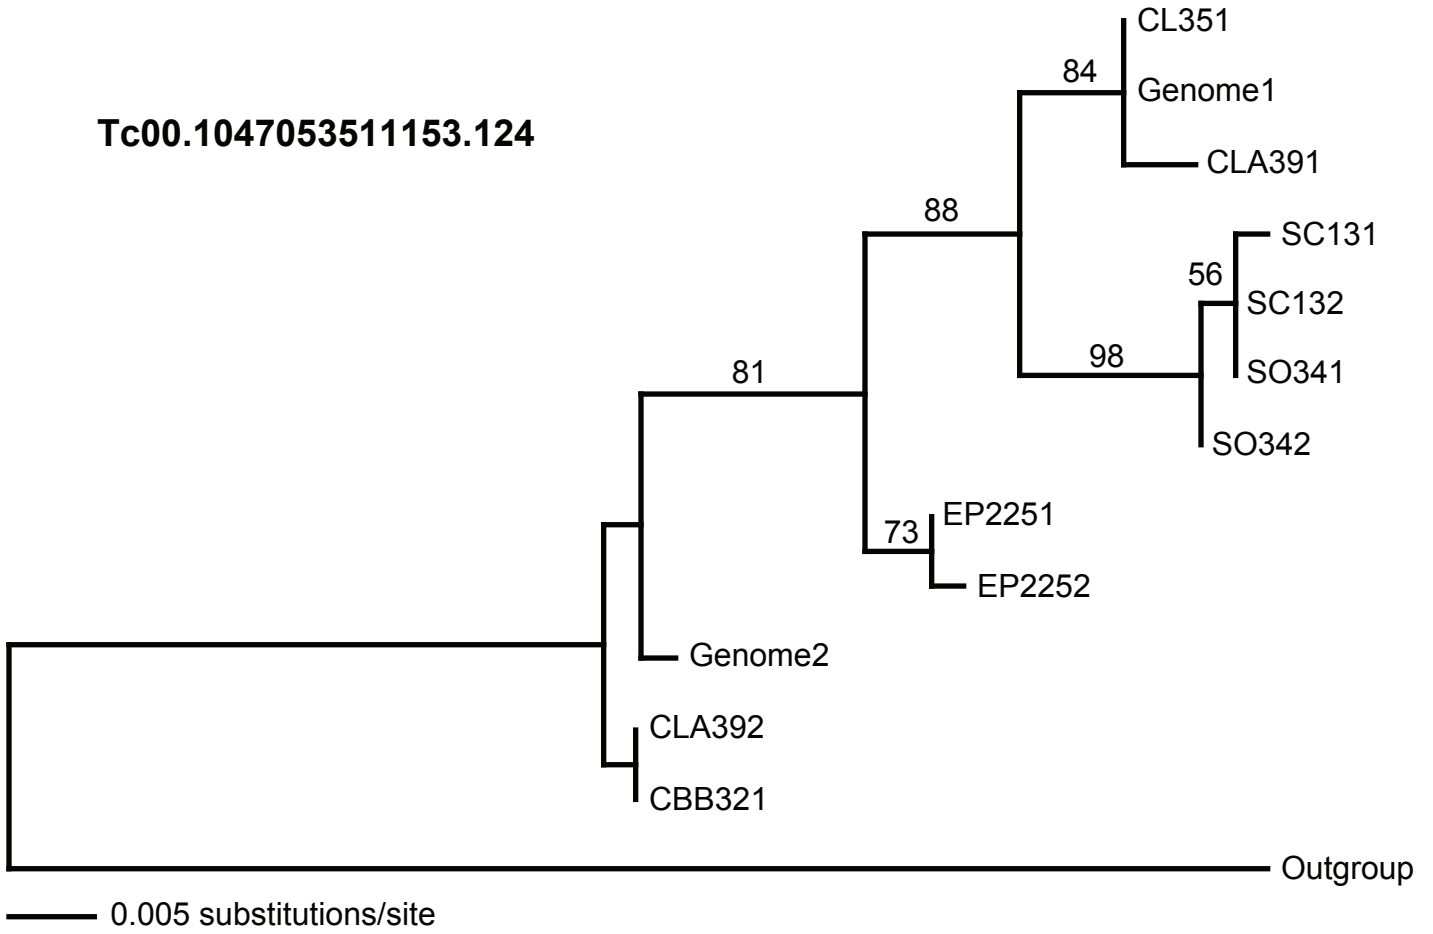

**Tc00.1047053510131.90**

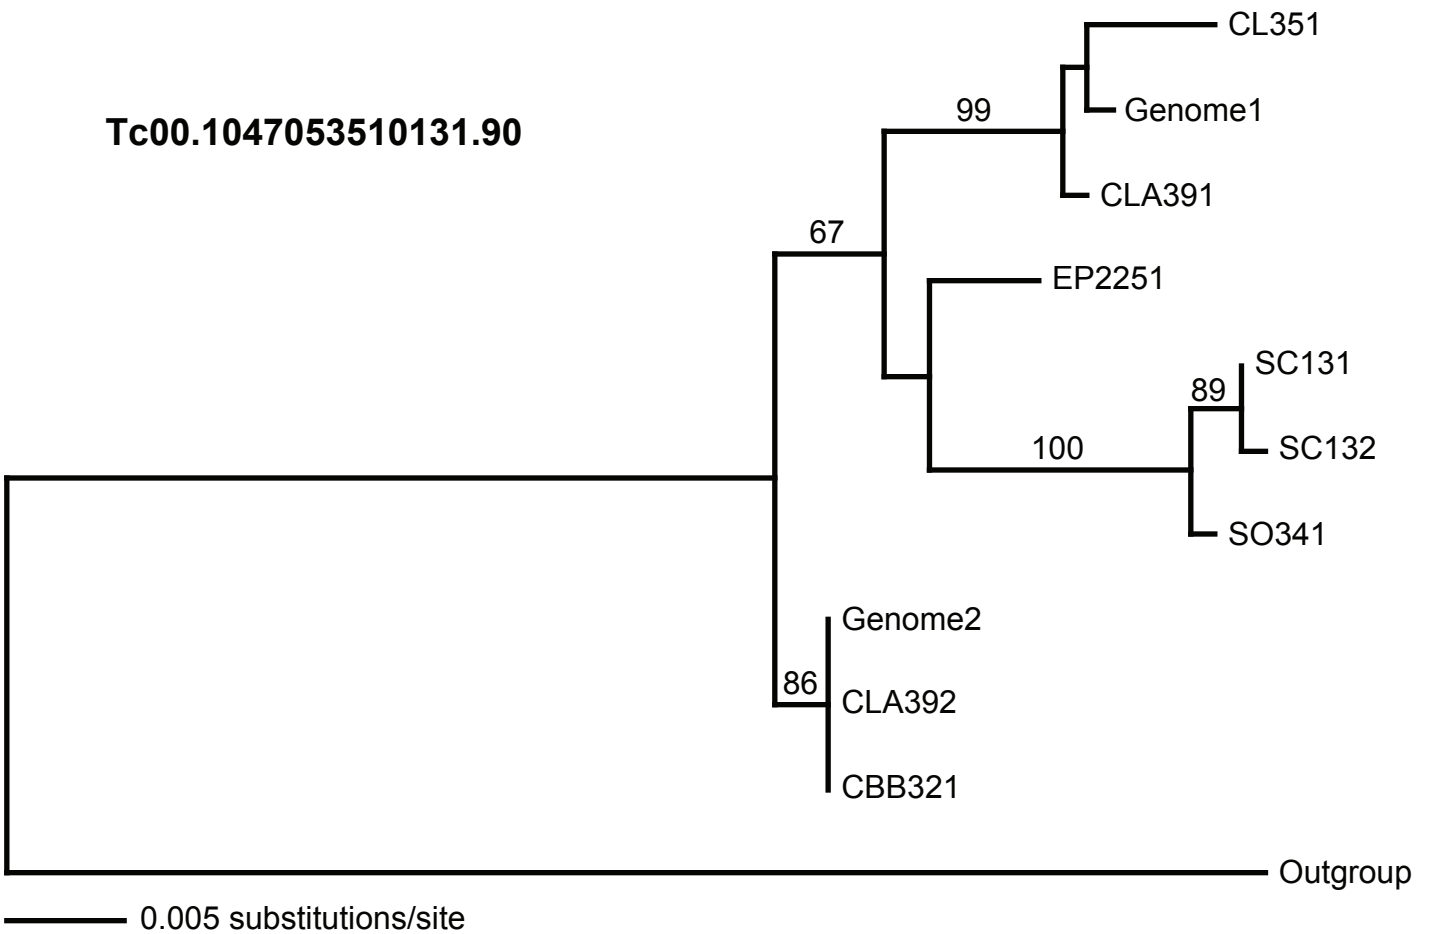

**Tc00.1047053508153.540**

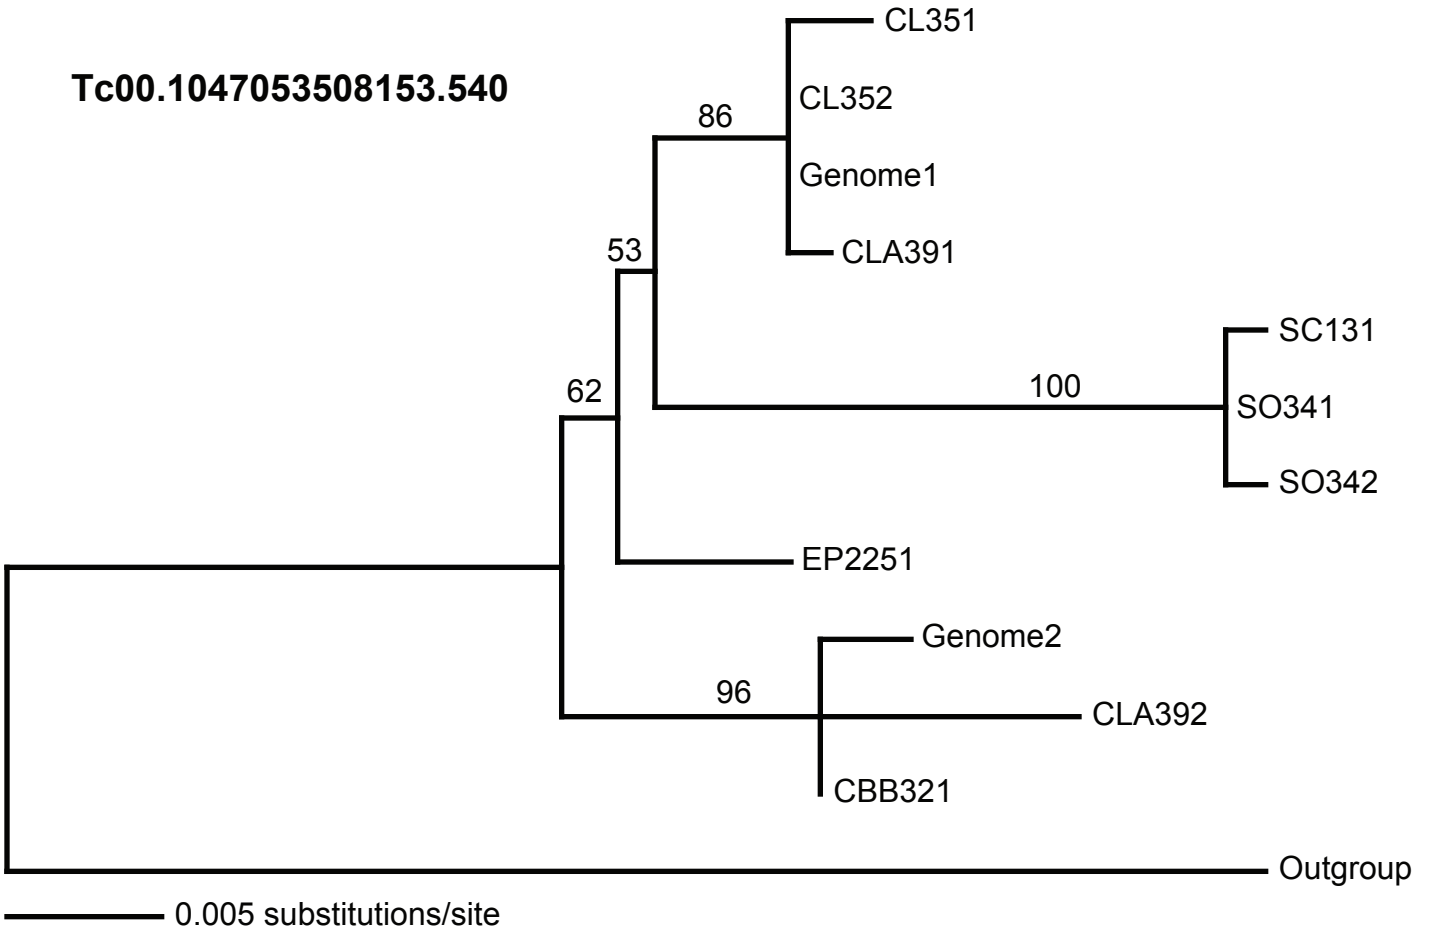

**Tc00.1047053503865.40**

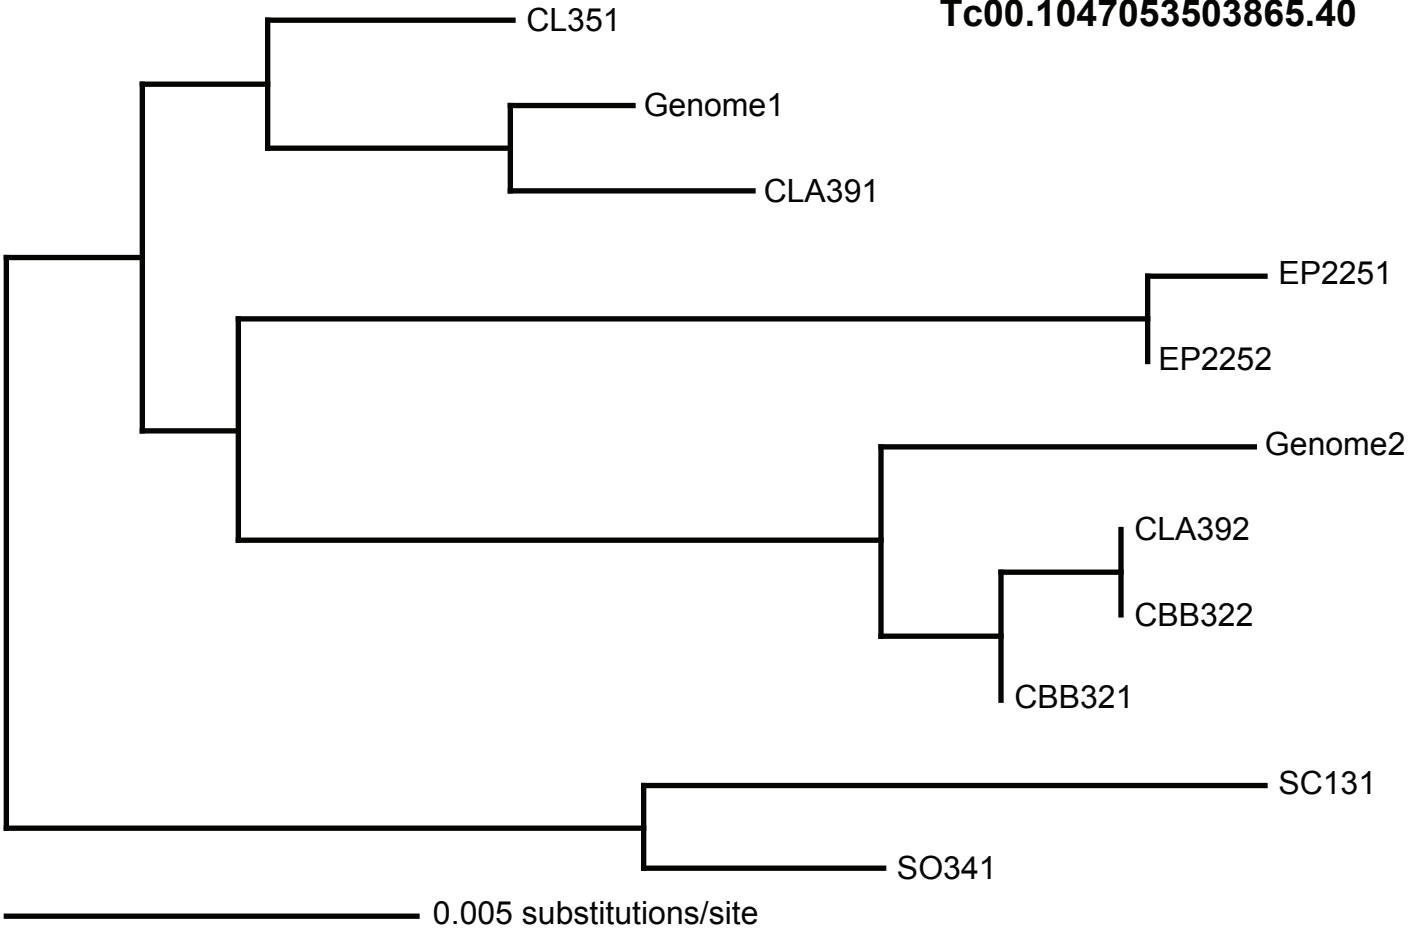



**Tc00.1047053510765.50**

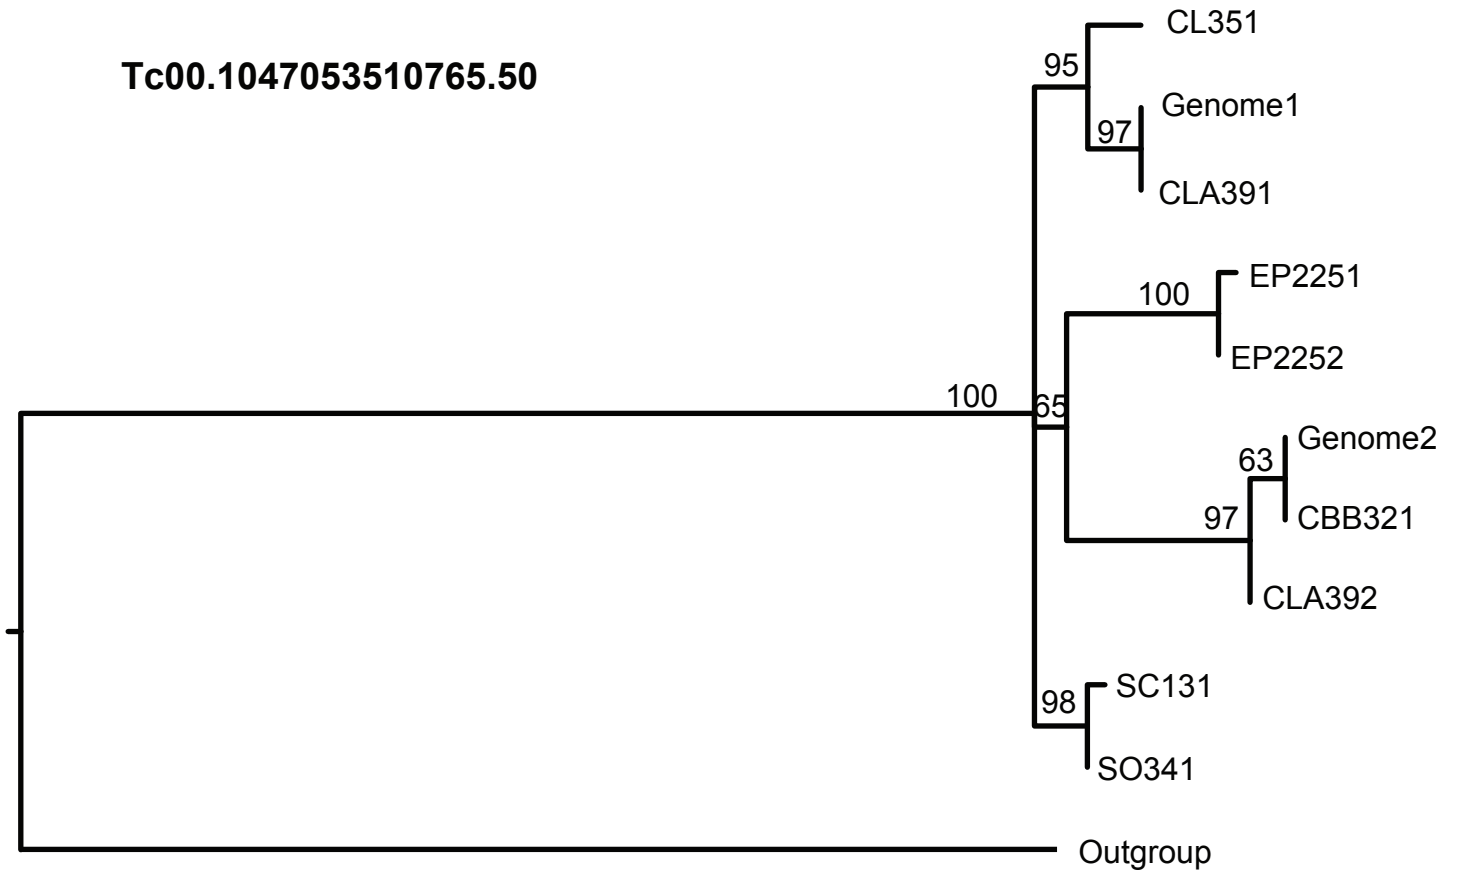

0.009 substitutions/site

**Tc00.1047053509967.50**

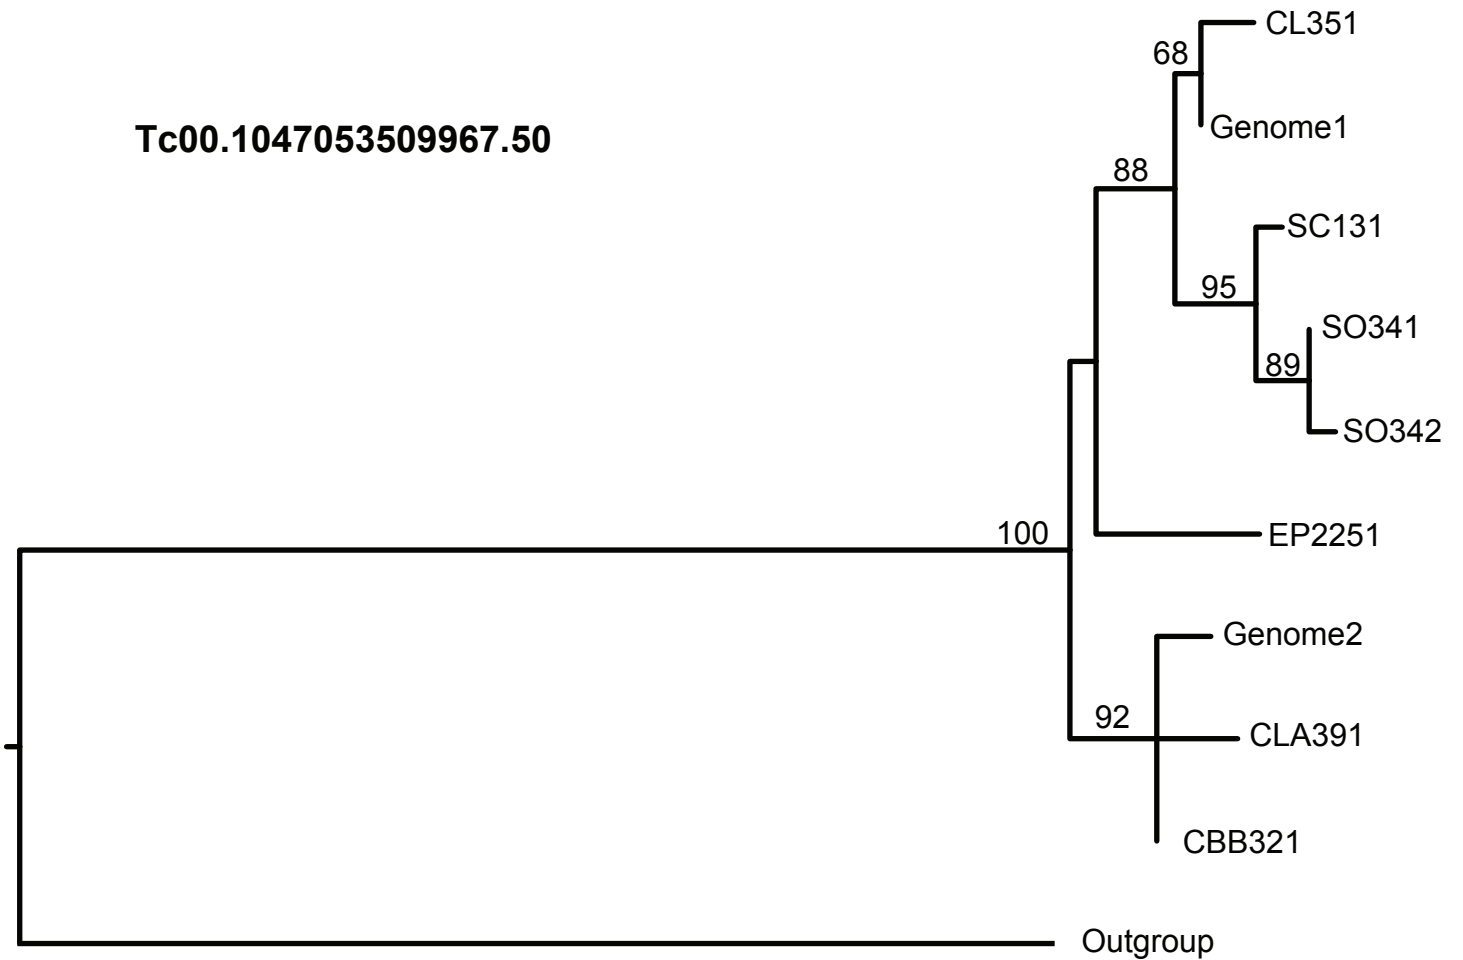

0.009 substitutions/site

**Tc00.1047053510101.480**

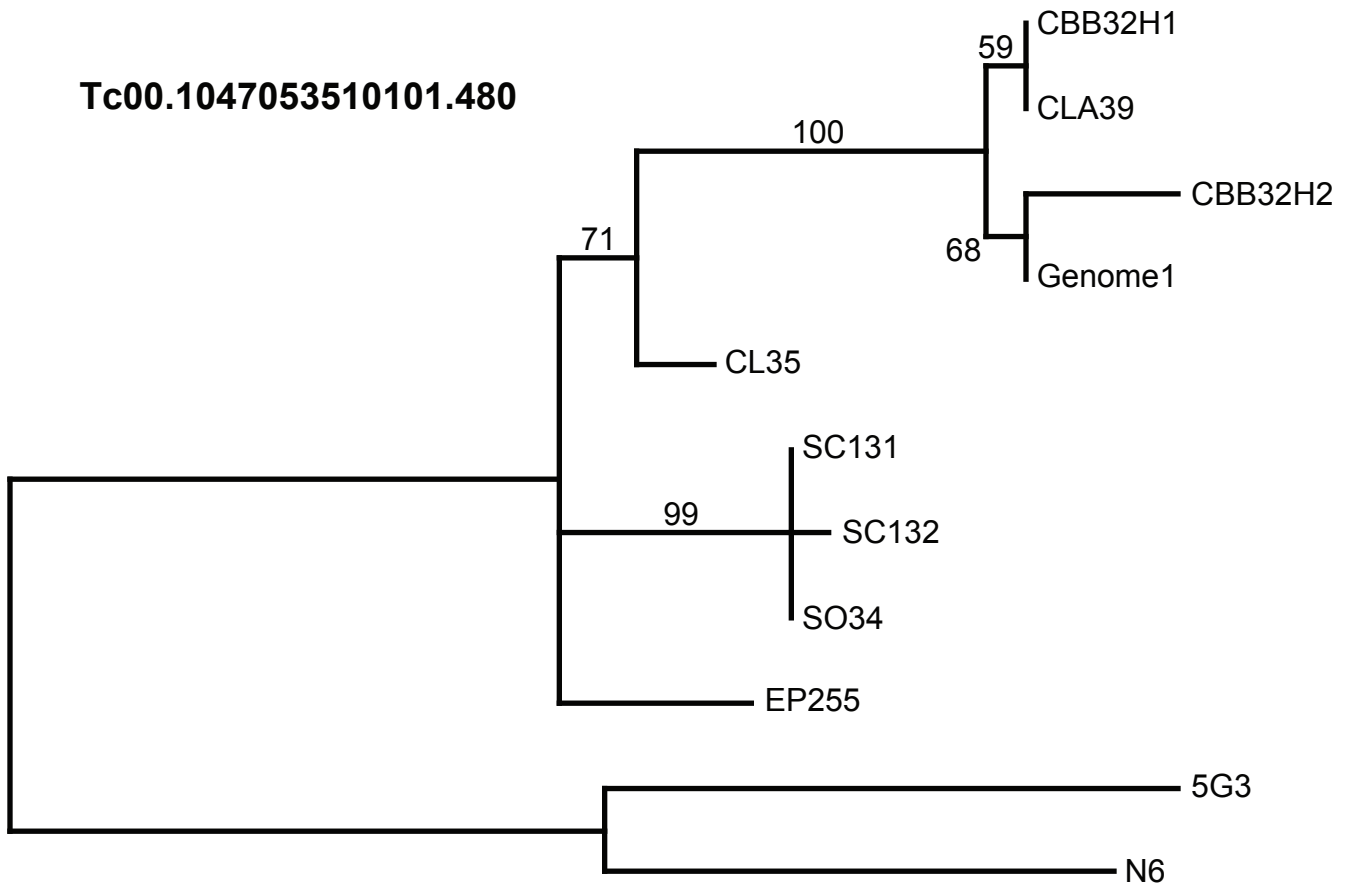

0.005 substitutions/site

**Tc00.1047053506525.150**

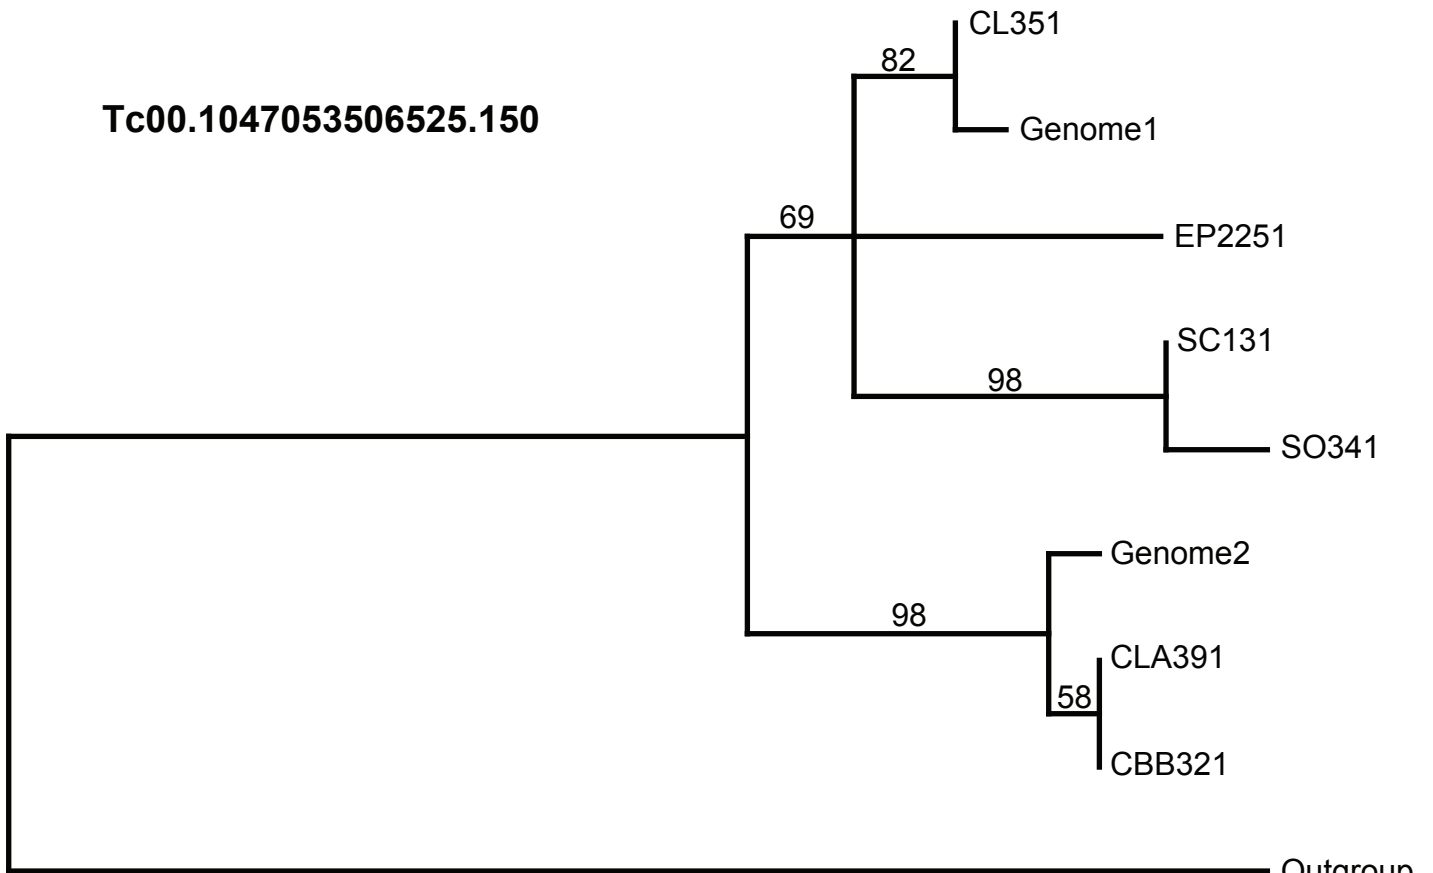

0.005 substitutions/site



**Tc00.1047053504045.100**

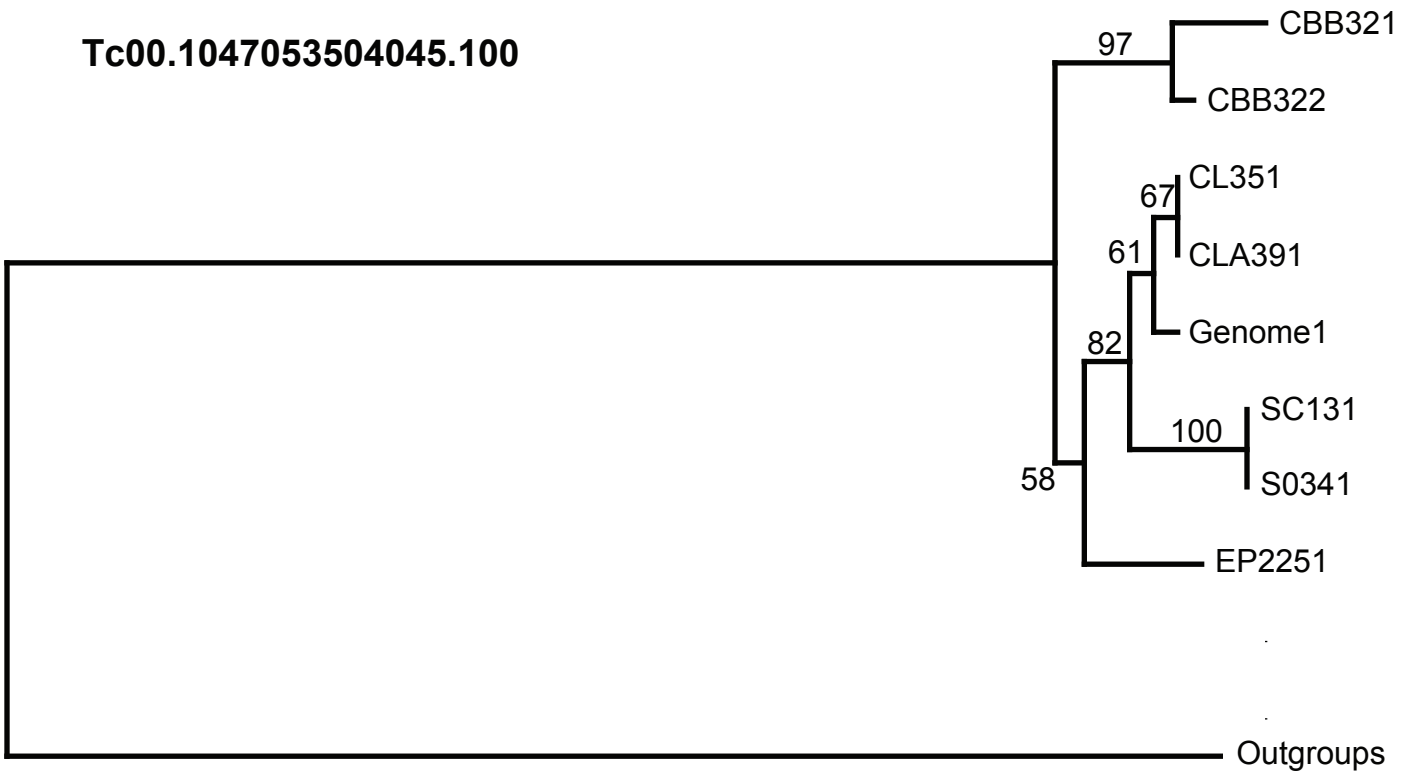

— 0.005 substitutions/site

**Tc00.1047053504057.80**

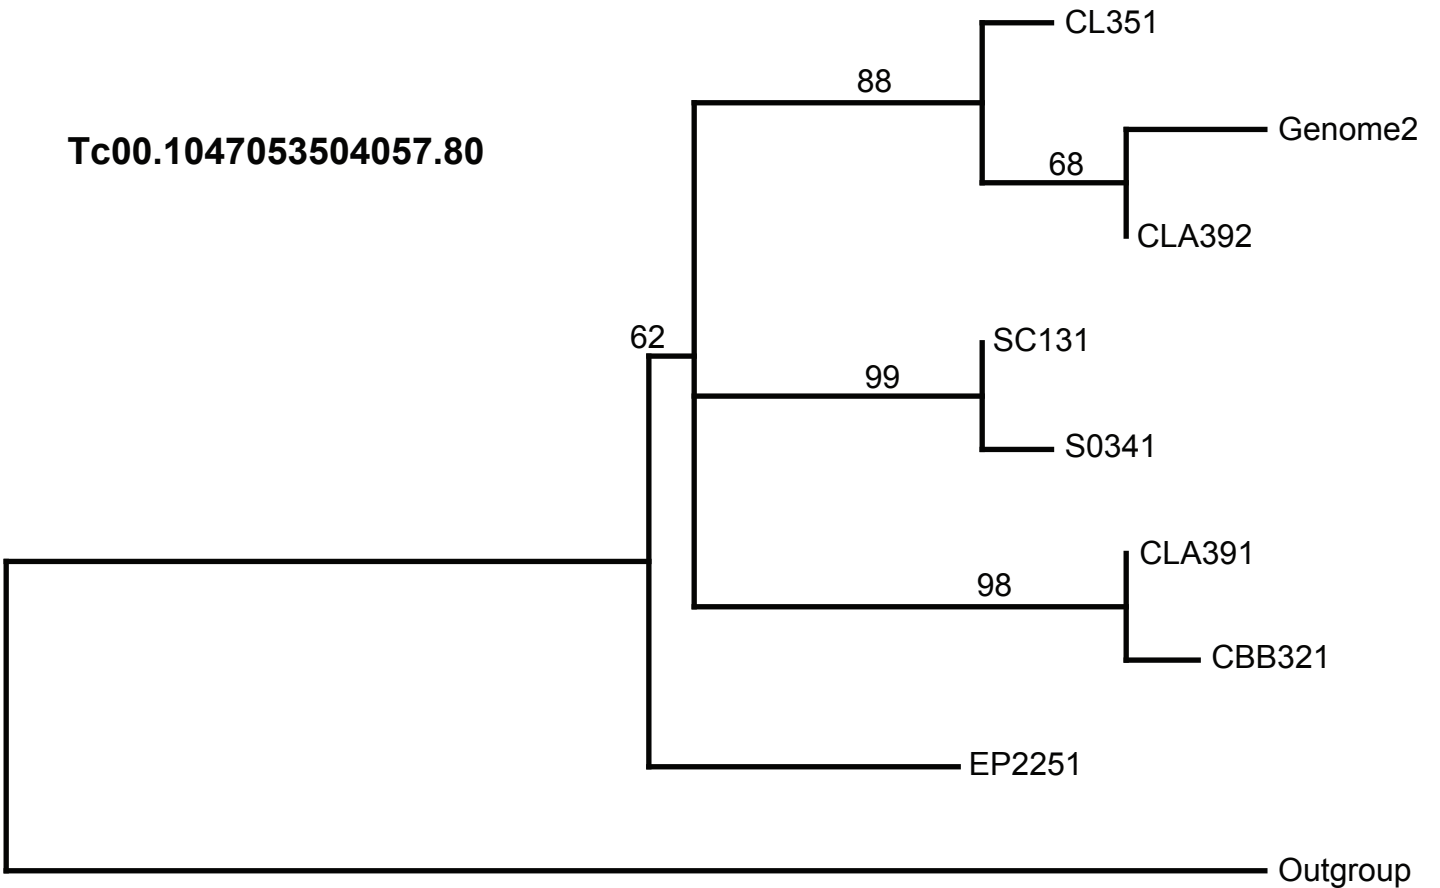

— 0.005 substitutions/site

**Tc00.1047053510877.190**

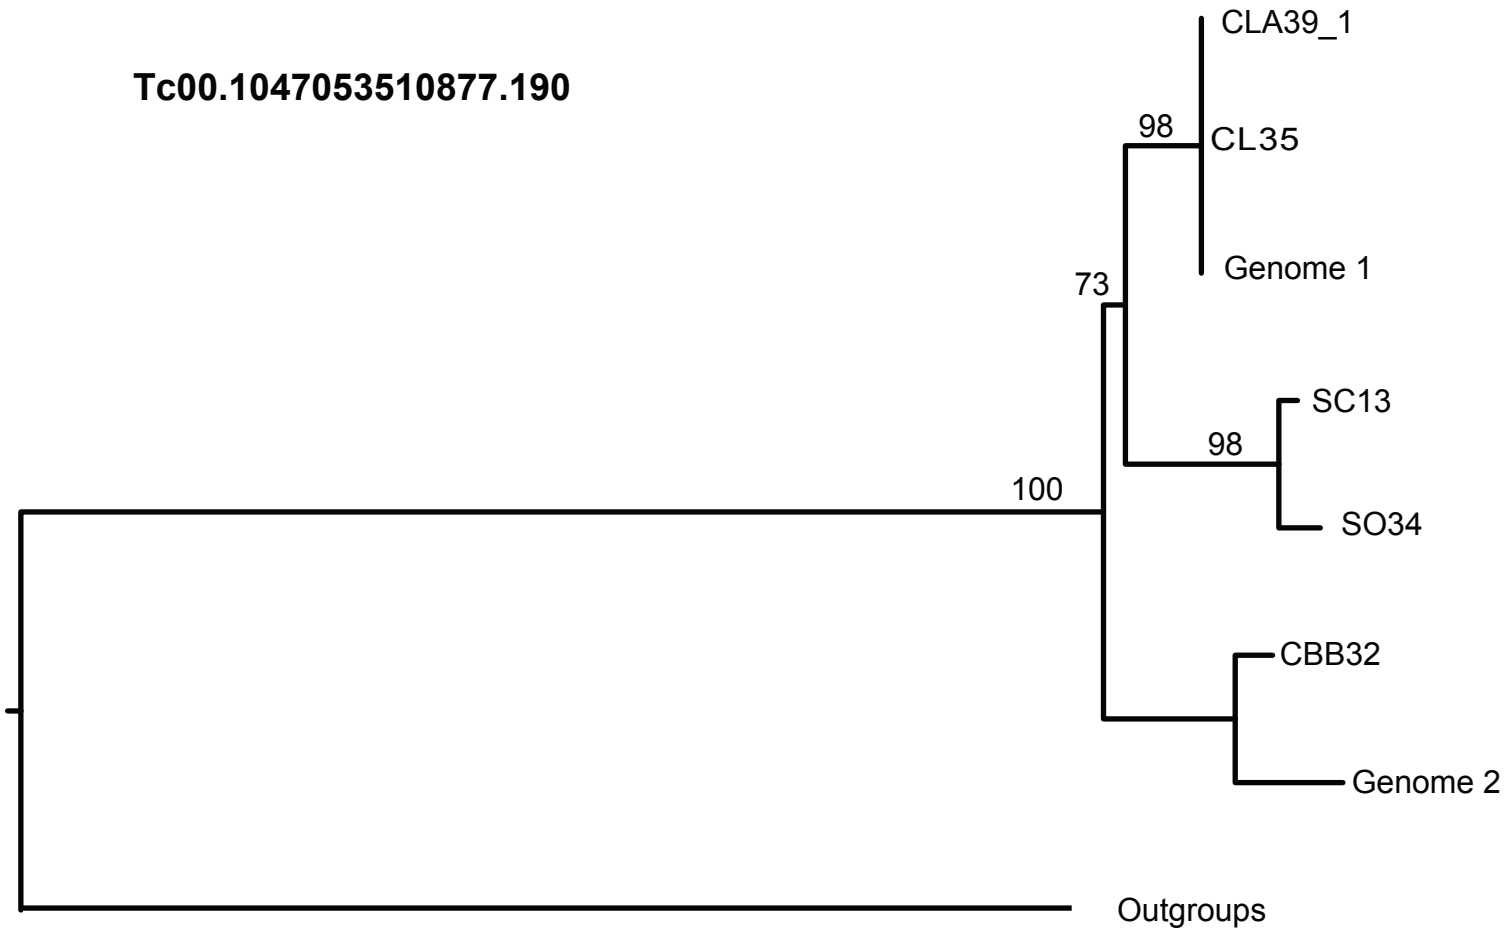

0.02 substitutions/site

**Tc00.1047053506739.20**

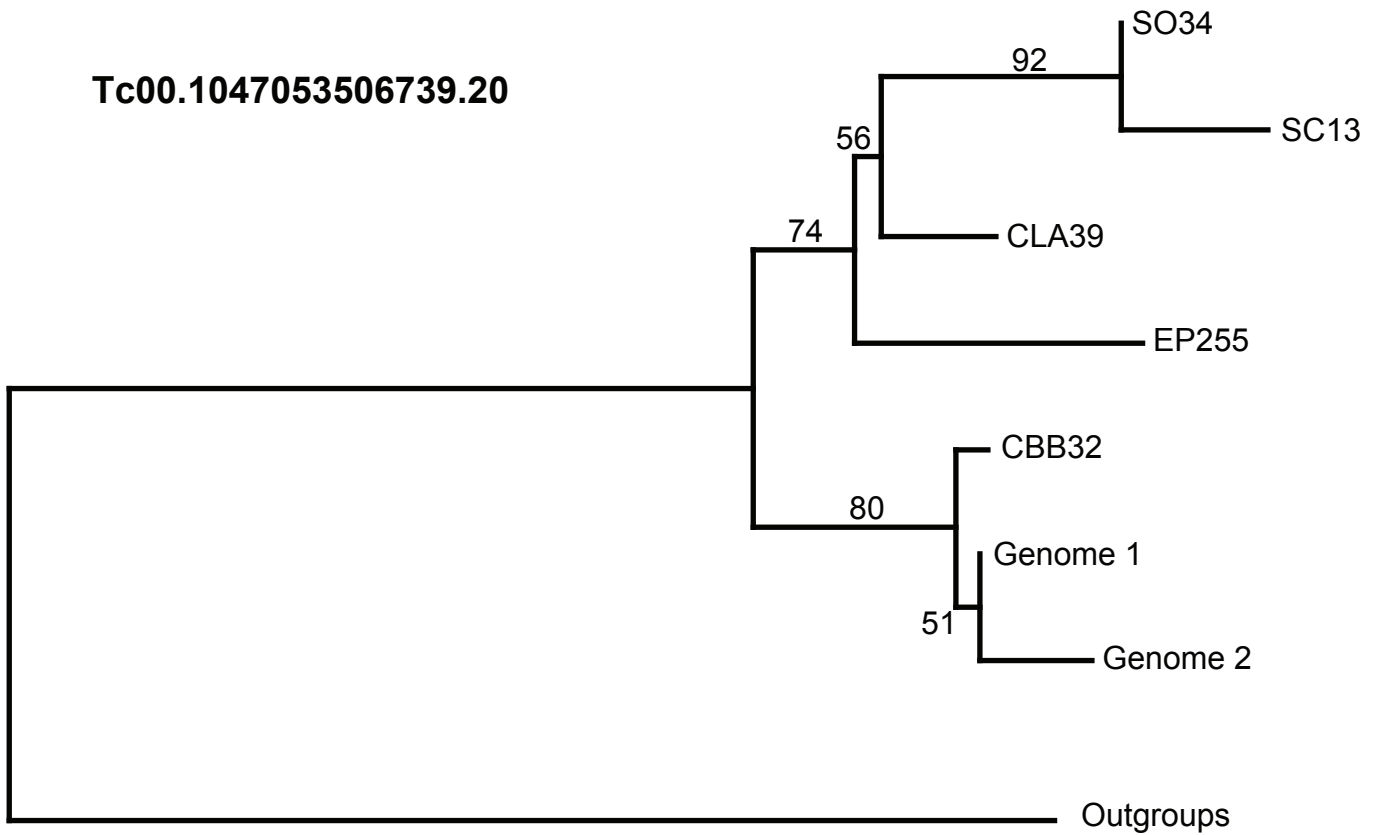

0.01 substitutions/site

**Tc00.1047053509007.30**

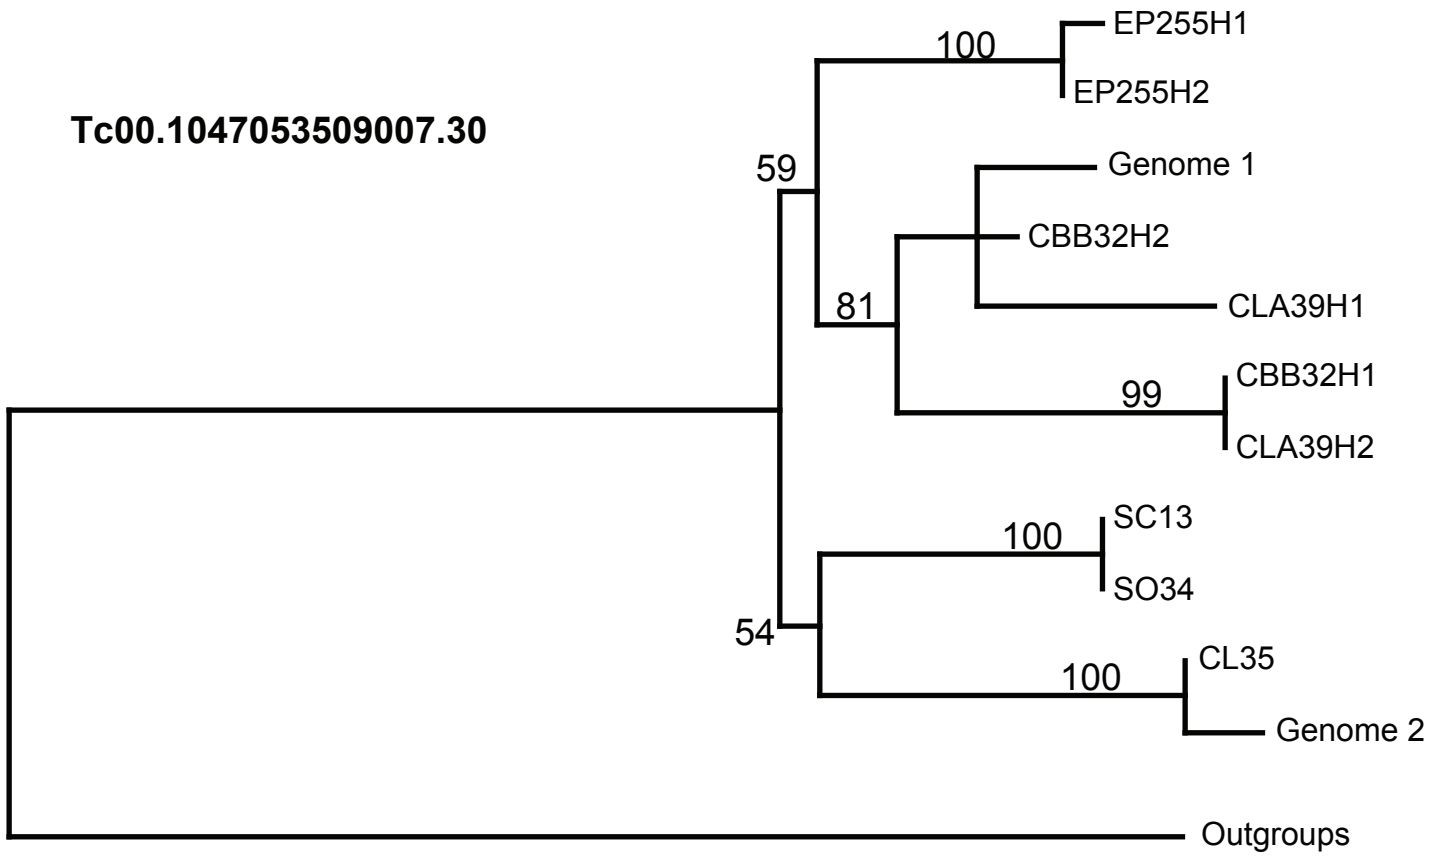

0.005 substitutions/site

**Tc00.1047053506247.200**

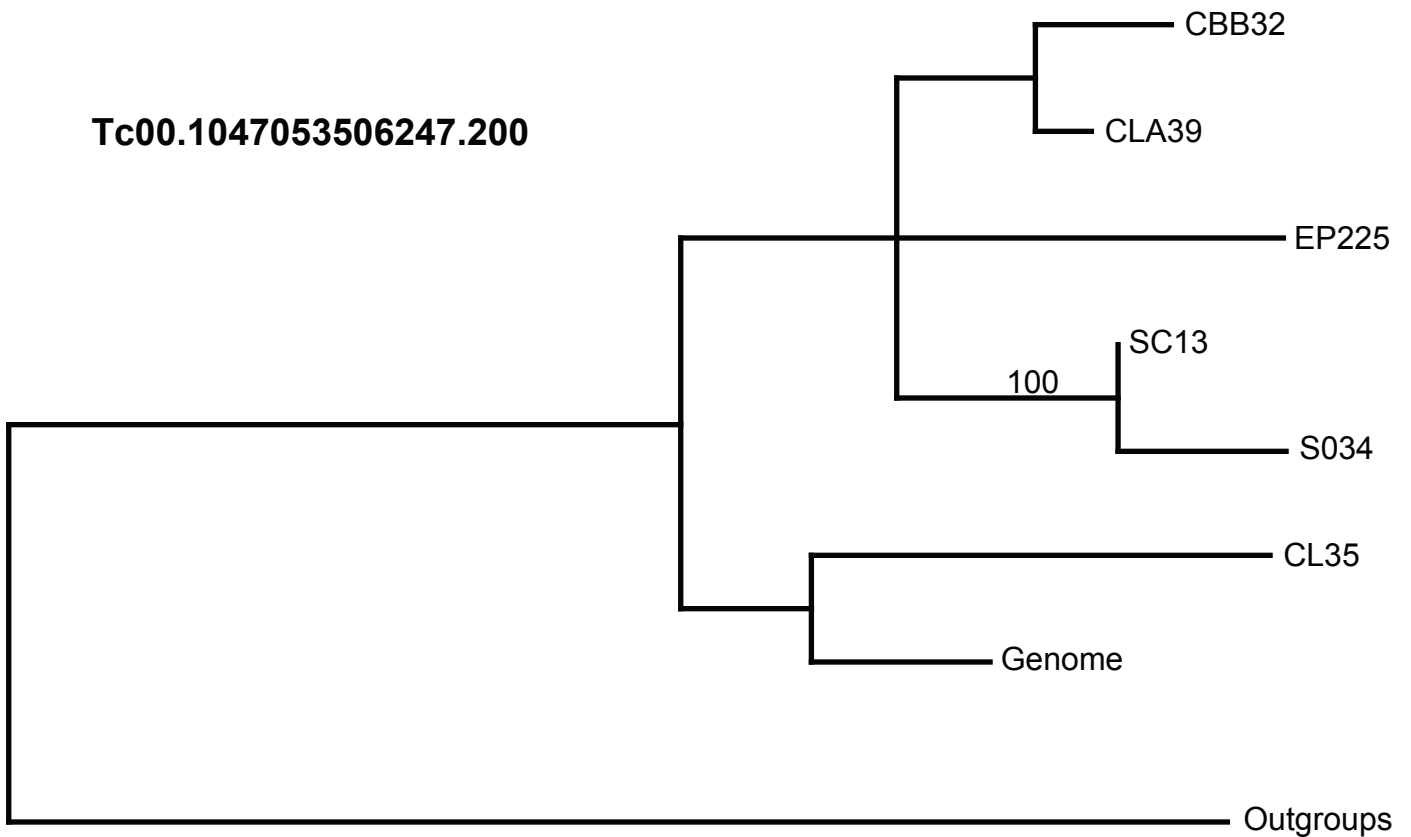

0.005 substitutions/site

**Tc00.1047053509105.70**

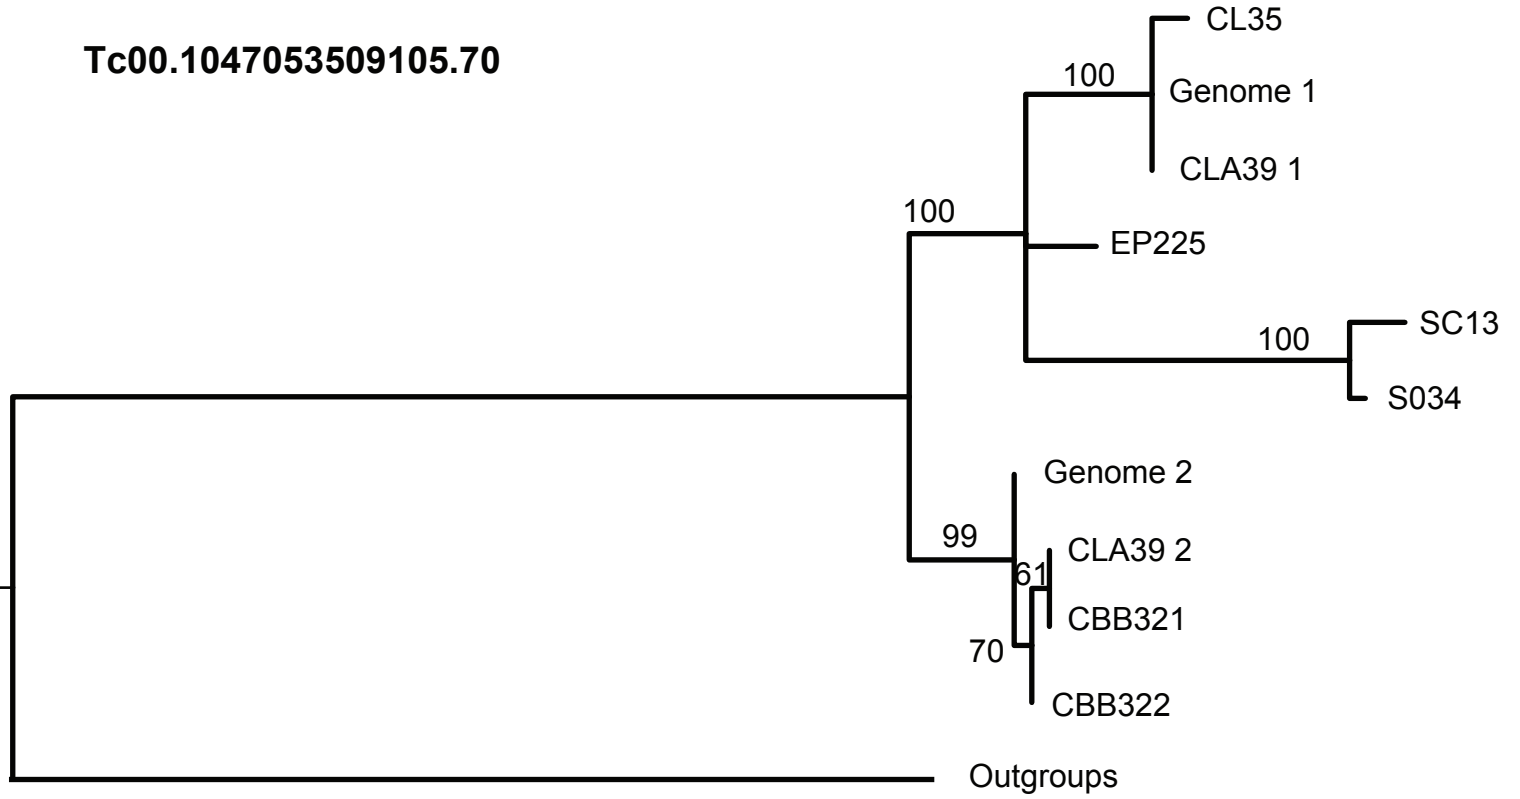

0.009 substitutions/site

**HSP70**

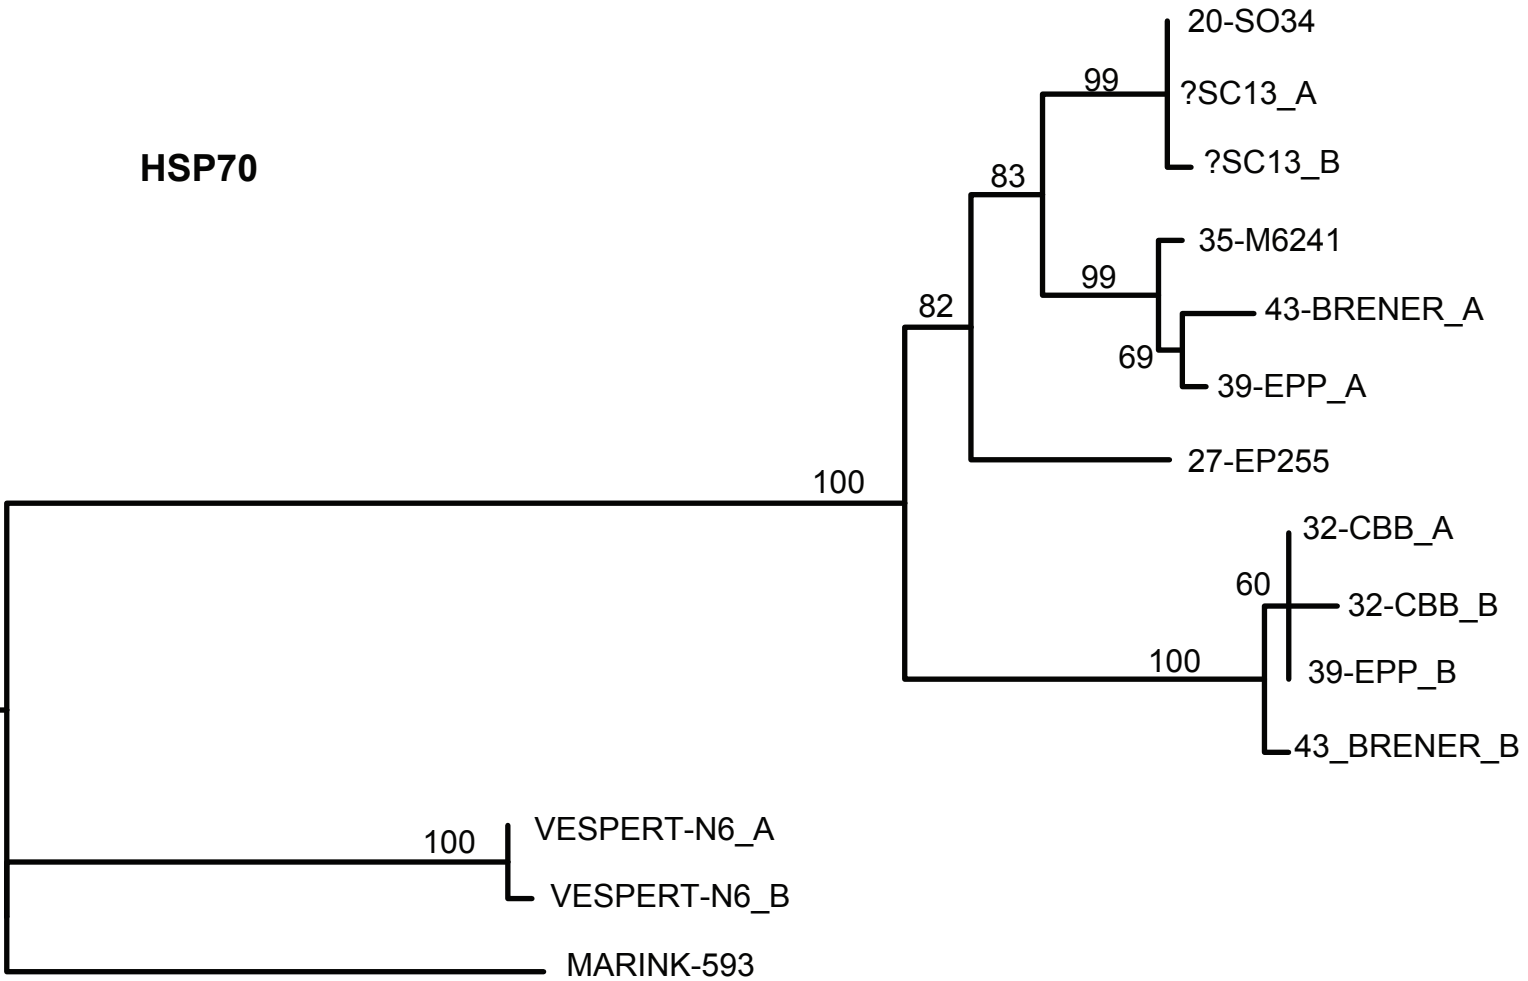

0.02 substitutions/site
