# Supplementary material for: Analyses of 32 Loci Clarify Phylogenetic Relationships among Trypanosoma cruzi Lineages and Support a Single Hybridization prior to Human Contact
Source: PubMed Central journal article supplement (PMC3149036; doi:10.1371/journal.pntd.0001272), 2011-08-02

Estimated Divergence times for main DTU clades of *T. cruzi* using nuclear loci with strict clock

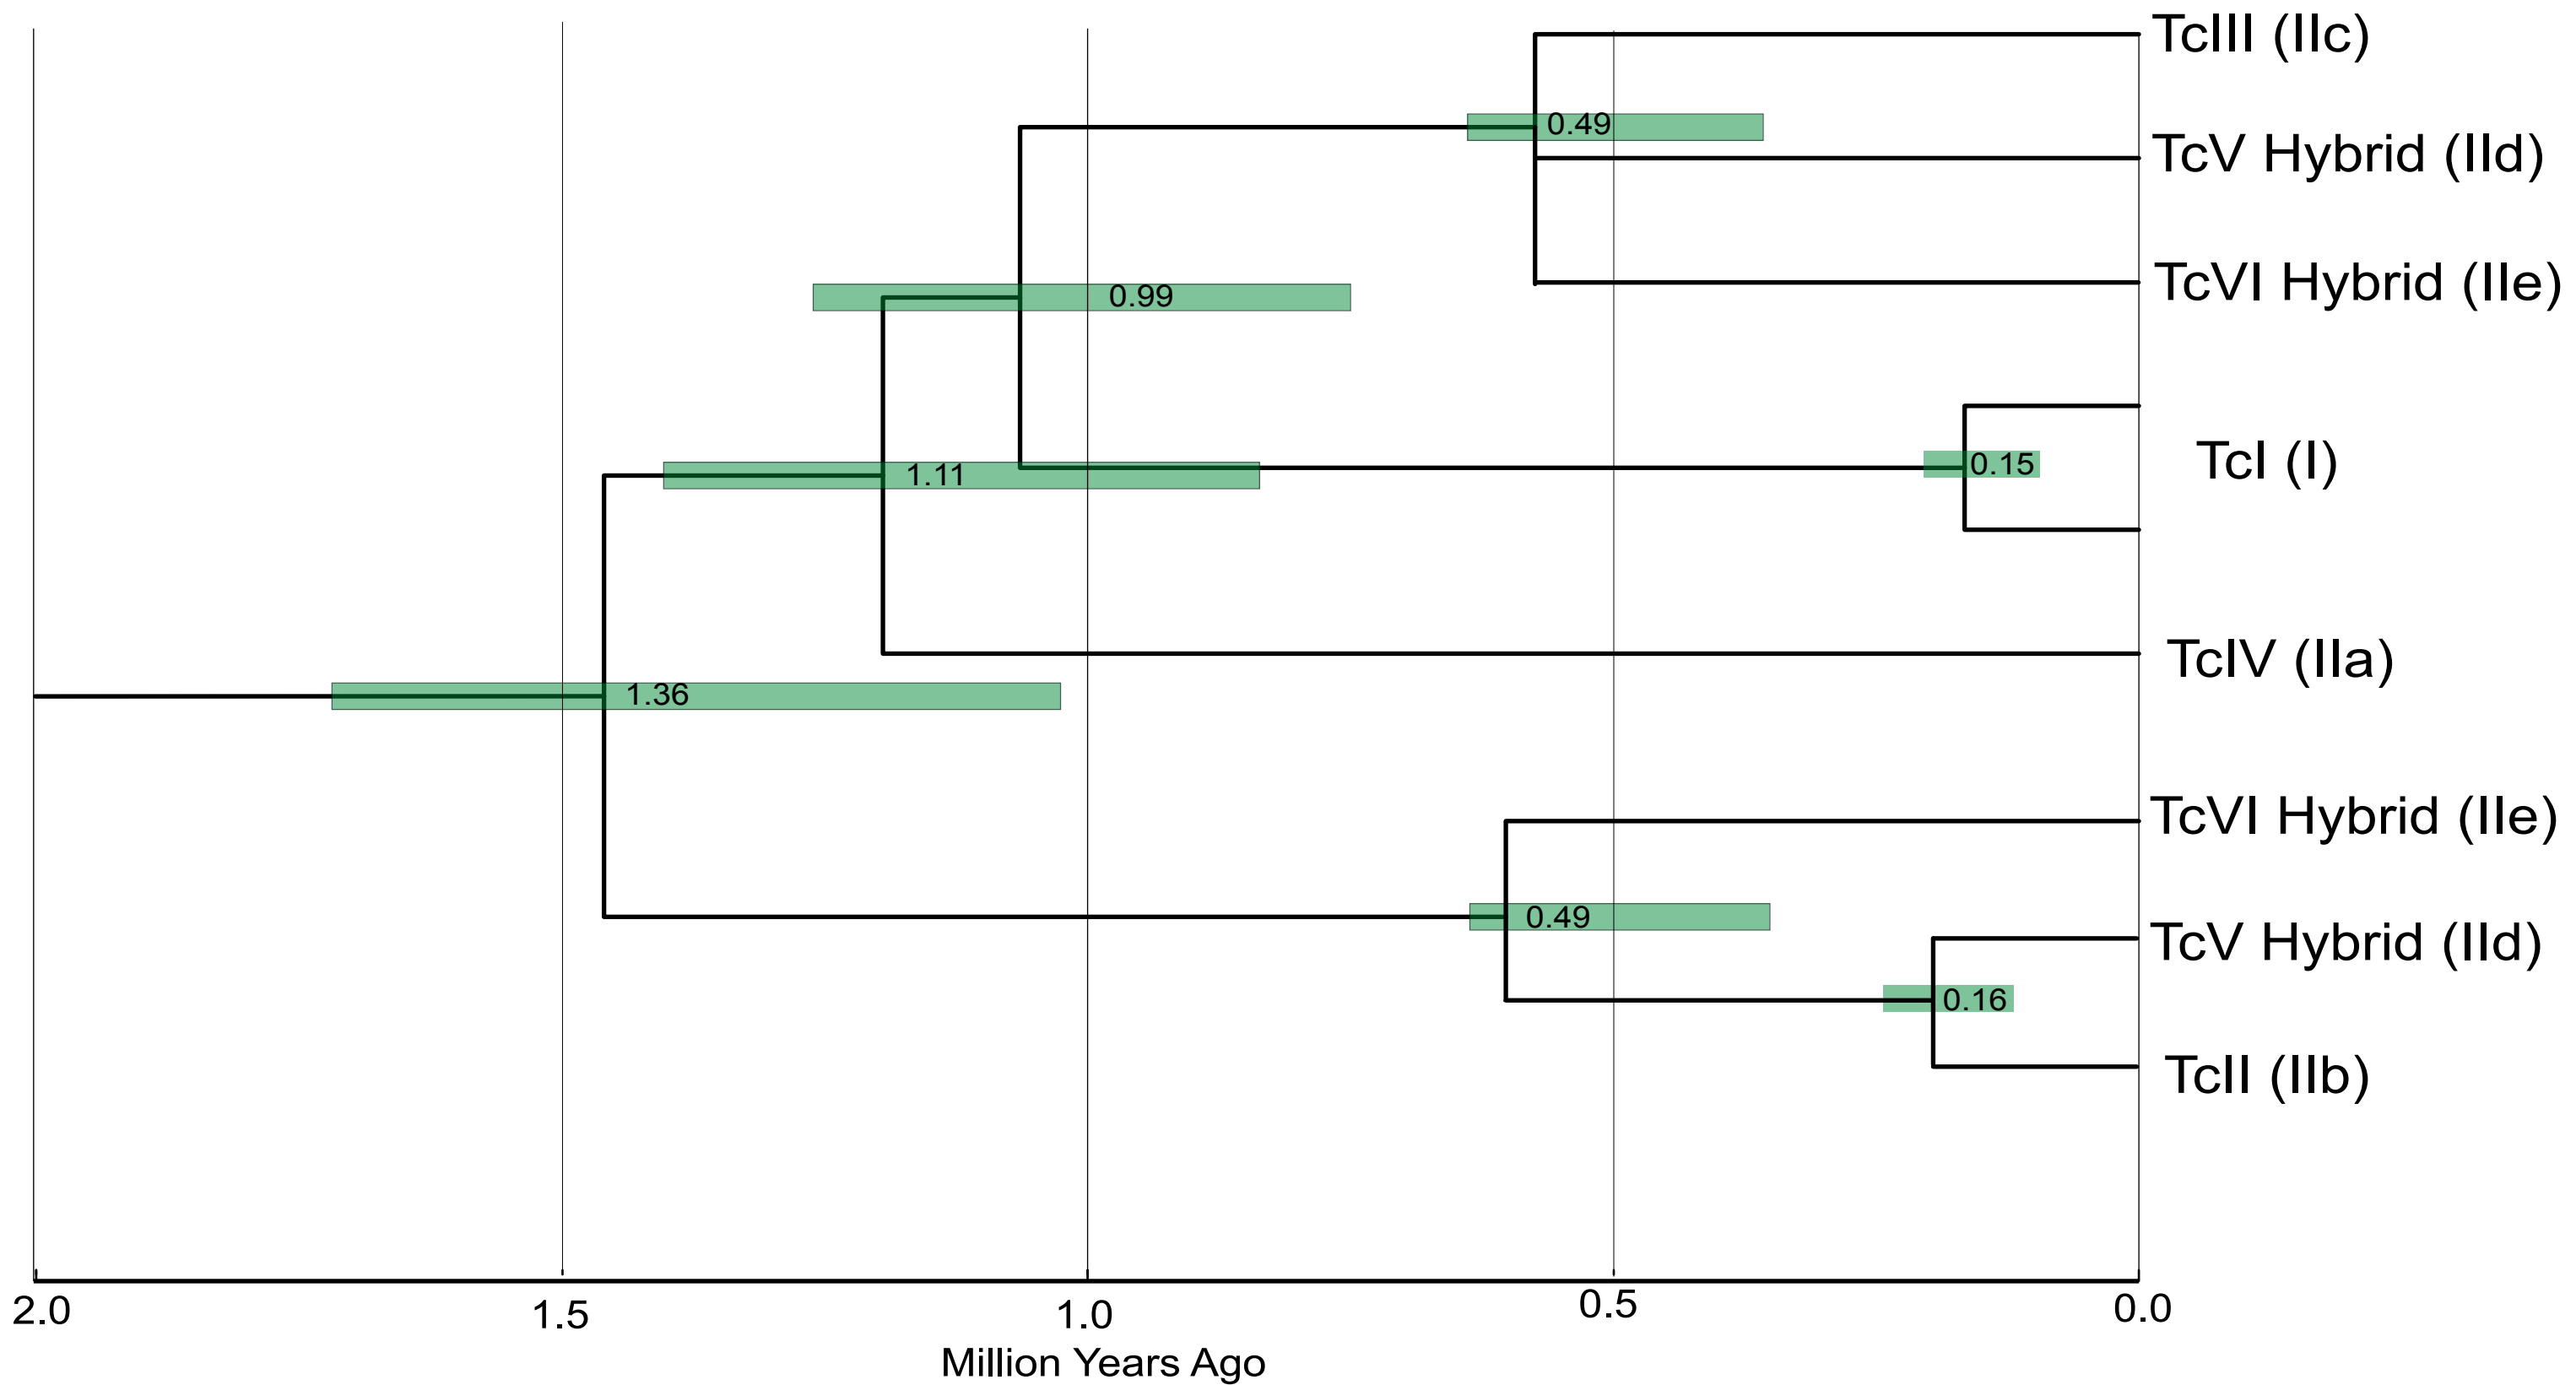

Supplement: pntd.0001272.s002.pdf [file pntd.0001272.s002.pdf]
